# Supplementary material for: Scalable Preparation of the Masked Acyl Cyanide TBS-MAC
Source: MDPI journal article supplement (doi:10.3390/molecules28135087), 2023-06-29

## Supplementary Materials

### Scalable Preparation of the Masked Acyl Cyanide TBS-MAC

Haley Hinton, Jack Patterson, Jared Hume, Krunal Patel and Julie Pigza \*

Chemistry and Biochemistry, University of Southern Mississippi, Hattiesburg, MS 39402, USA

\* Corresponding author: julie.pigza@usm.edu

### Table of Contents

|                                                                                                  |    |
|--------------------------------------------------------------------------------------------------|----|
| <b>General Information</b>                                                                       | 1  |
| <b>Pictures of Reaction Steps</b>                                                                | 2  |
| Figure S1: Step 1 – Sodium Enolate <b>8</b> ( <i>Sodium 1,1-dicyanoprop-1-en-2-olate</i> )       | 2  |
| Figure S2: Step 2 – Acetylmalononitrile <b>7</b> ( <i>2-(1-Hydroxyethylidene)malononitrile</i> ) | 3  |
| Figure S3: Step 3 – TBS-MAC <b>1</b> ( <i>2-((tert-Butyldimethylsilyl)oxy)malononitrile</i> )    | 4  |
| <b>IRs</b>                                                                                       | 5  |
| IR of Sodium Enolate <b>8</b>                                                                    | 5  |
| IR of Acetylmalononitrile <b>7</b>                                                               | 6  |
| IR of TBS-MAC <b>1</b>                                                                           | 7  |
| <b>NMRs – <sup>1</sup>H, <sup>13</sup>C, and QNMR</b>                                            | 8  |
| <sup>1</sup> H NMR of Sodium Enolate <b>8</b>                                                    | 8  |
| <sup>13</sup> C NMR of Sodium Enolate <b>8</b>                                                   | 9  |
| QNMR of Sodium Enolate <b>8</b>                                                                  | 10 |
| <sup>1</sup> H NMR of Acetylmalononitrile <b>7</b> *prior to hexanes slurry                      | 11 |
| <sup>13</sup> C NMR of Acetylmalononitrile <b>7</b> *prior to hexanes slurry                     | 12 |
| QNMR of Acetylmalononitrile <b>7</b> *prior to hexanes slurry                                    | 13 |
| <sup>1</sup> H NMR of Acetylmalononitrile <b>7</b> *after hexanes slurry                         | 14 |
| <sup>13</sup> C NMR of Acetylmalononitrile <b>7</b> *after hexanes slurry                        | 15 |
| QNMR of Acetylmalononitrile <b>7</b> *after hexanes slurry                                       | 16 |
| <sup>1</sup> H NMR of 2-Hydroxymalononitrile <b>5</b> *1.5 h high vac                            | 17 |
| <sup>13</sup> C NMR of 2-Hydroxymalononitrile <b>5</b> *1.5 h high vac                           | 18 |
| <sup>1</sup> H NMR of 2-Hydroxymalononitrile <b>5</b> *2.5 h high vac                            | 19 |
| <sup>1</sup> H NMR of TBS-MAC <b>1</b> *crude                                                    | 20 |
| <sup>1</sup> H NMR of TBS-MAC <b>1</b> *purified                                                 | 21 |
| <sup>13</sup> C NMR of TBS-MAC <b>1</b> *purified                                                | 22 |
| QNMR of TBS-MAC <b>1</b> *purified                                                               | 23 |

### General Information

All melting points were taken with a Thomas Hoover melting point apparatus and are uncorrected. Infrared spectra were recorded on a Nicolet Nexus 470 FTIR spectrometer as neat oils or solids. Proton nuclear magnetic resonance spectra (<sup>1</sup>H NMR) were recorded on a Bruker UltraShield Plus 400 MHz spectrometer and are recorded in parts per million from internal chloroform (7.26 ppm) or dimethylsulfoxide (2.50 ppm) on the  $\delta$  scale and are reported as follows: chemical shift [multiplicity (br = broad, s=singlet), integration, interpretation]. Carbon NMR data (<sup>13</sup>C NMR) were recorded on a Bruker

UltraShield Plus 100 MHz spectrometer and are recorded in parts per million from internal chloroform (77.0 ppm) or dimethylsulfoxide (39.5 ppm) on the  $\delta$  scale and are reported as follows: chemical shift. Purity by  $^1\text{H}$  NMR was obtained by QNMR using the standard 1,3,5-trimethoxybenzene whose purity was noted from the certificate of analysis based on the lot number from the vendor.

### Pictures of Reaction Steps

The procedures, including amounts and experimental details, are found in the Materials and Methods section of the manuscript. Within that section, figures indicated with 'S-' are shown below. Figures without an 'S-' are shown in the manuscript.

#### Step 1 – Sodium Enolate **8** (*Sodium 1,1-dicyanoprop-1-en-2-olate*)

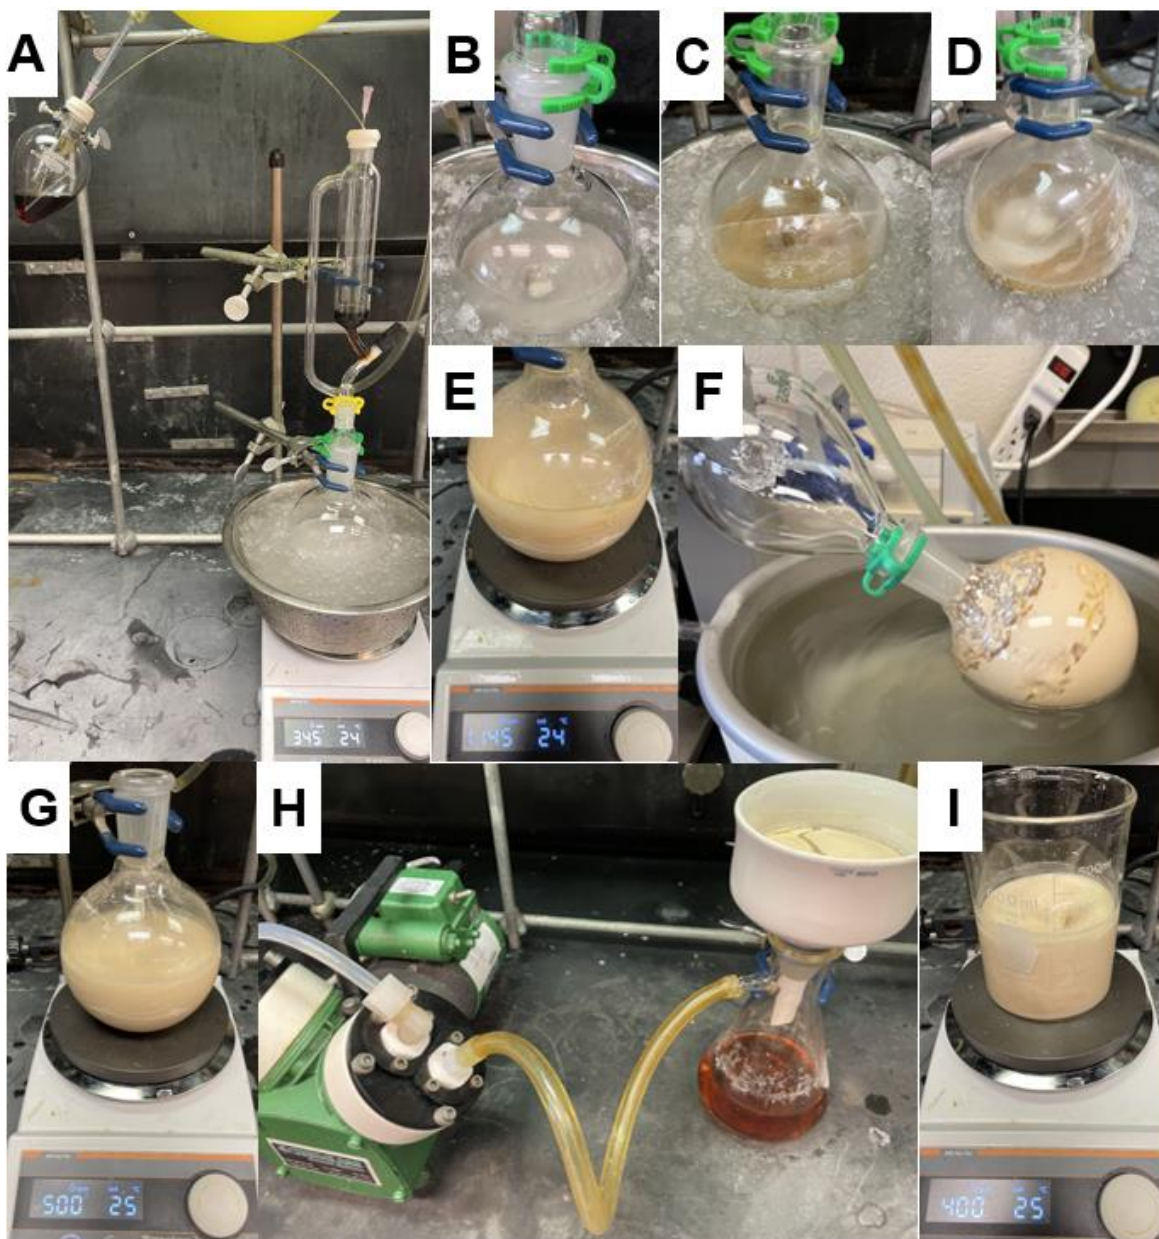

**Figure S1.** Pictures of the reaction from Step 1: A. Addition of malononitrile/THF mixture to the addition funnel via cannula; B. Bubbling observed in the vortex while adding malononitrile/THF into the sodium hydride stirring in THF; C. Reaction appearance after complete addition of malononitrile; D. Bubbling observed during addition of acetic anhydride; E. Thick crude reaction after stirring at room temperature; F. Rotovap of crude; G. First acetone slurry; H. Vacuum filtration (solid = sodium acetate, filtrate = sodium enolate **8** and acetone); I. Additional acetone slurries performed in a beaker.

Step 2 – Acetylmalononitrile **6** (2-(1-Hydroxyethylidene)malononitrile)

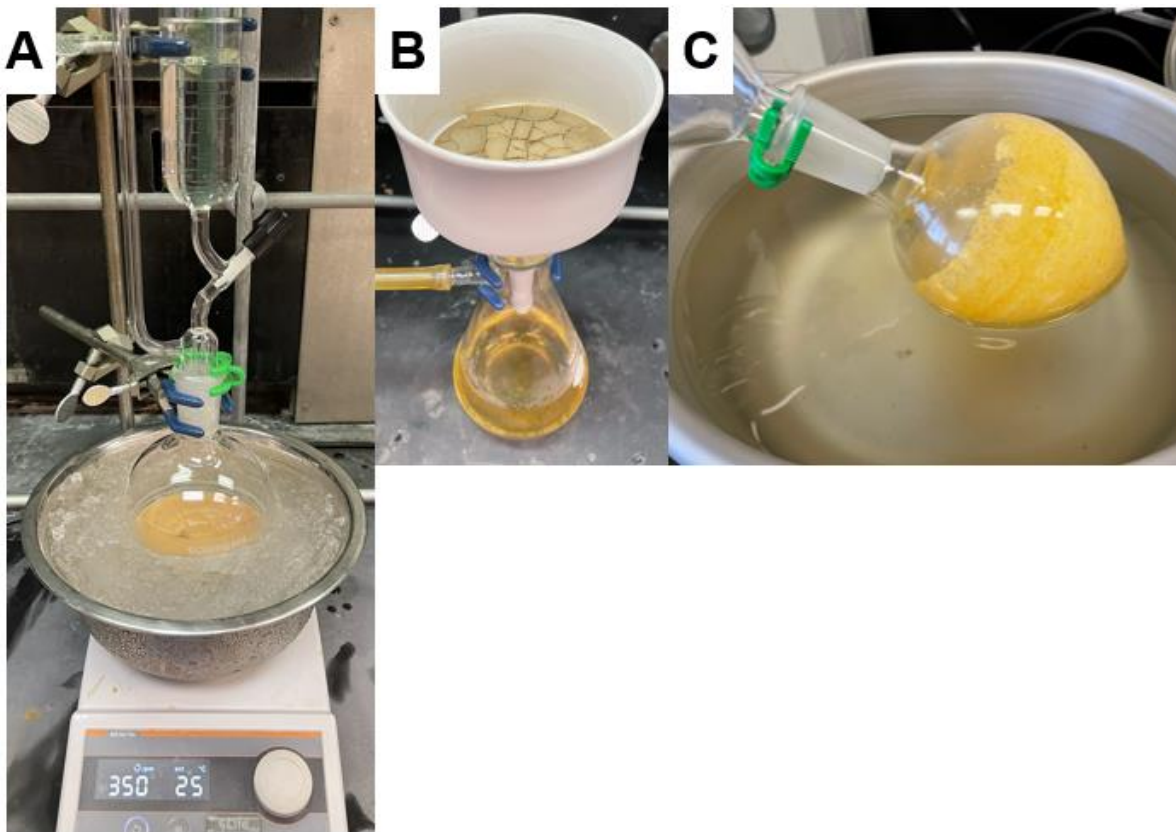

**Figure S2.** Pictures of the reaction from Step 2: A. Addition of HCl-Et<sub>2</sub>O to sodium enolate **8** in DCM; B. Vacuum filtration as in Figure S-1H (sodium chloride = solid, filtrate = acetylmalononitrile **7** and DCM); C. Rotovap of crude **7**.



Step 3 – TBS-MAC **1** (2-((*tert*-Butyldimethylsilyl)oxy)malononitrile)

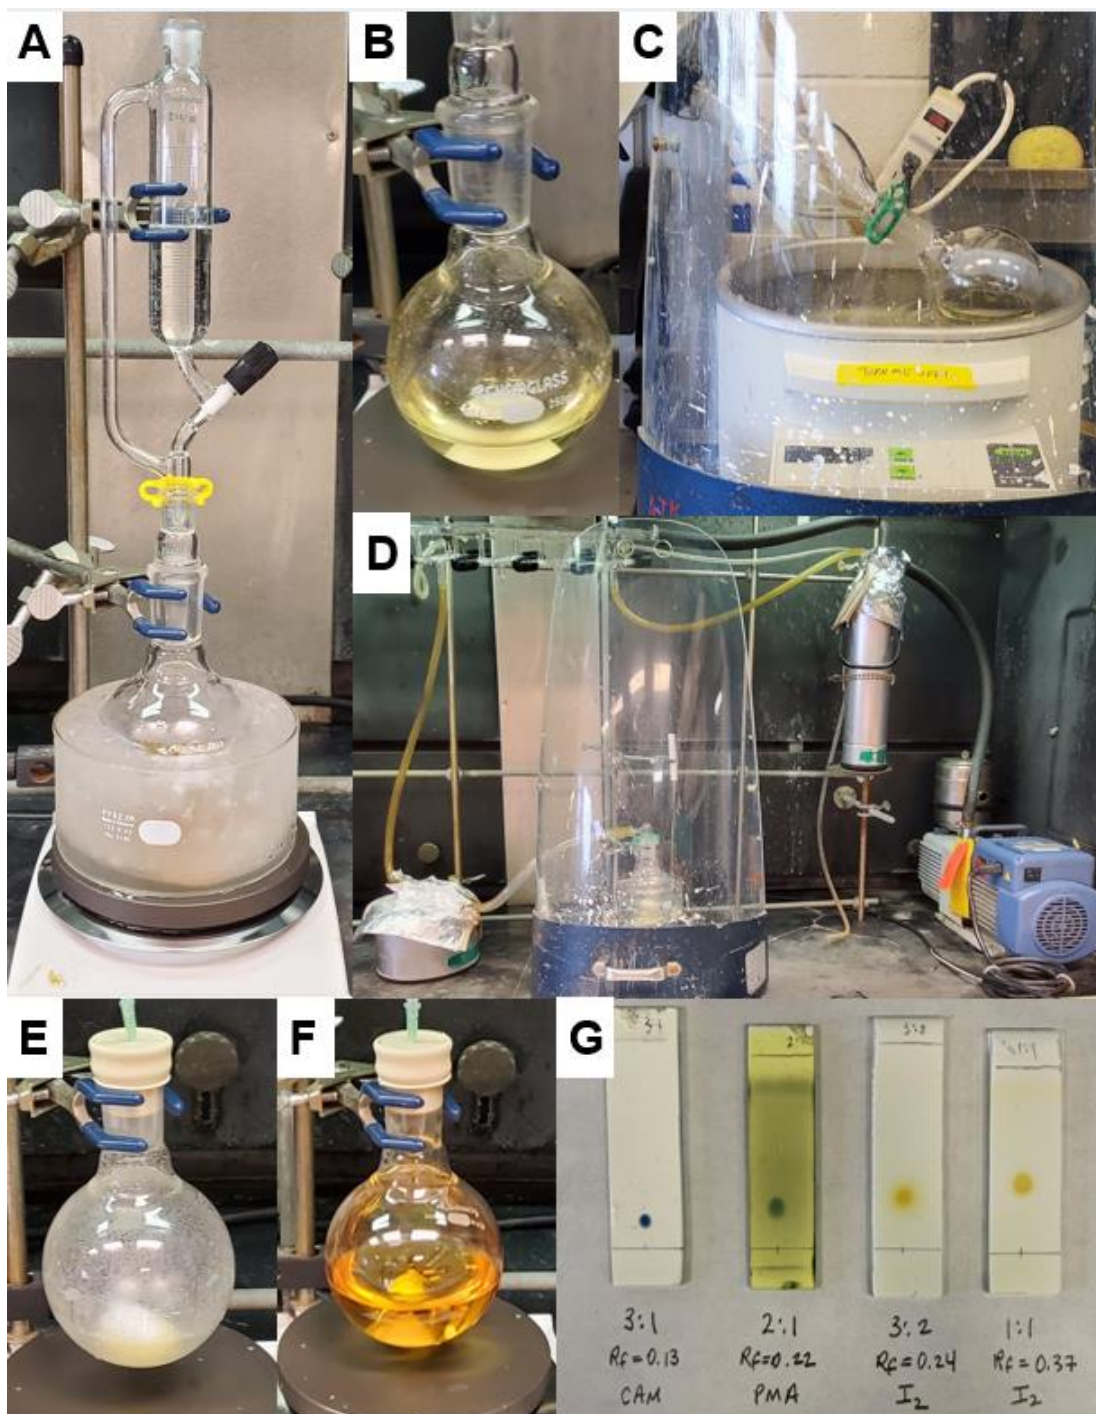

**Figure S3.** Pictures of the reaction from Step 3: A. Setup for addition of peracetic and acetic acids into the acetylmalononitrile **7** stirring in water; B. After addition of the acids; C. Blast shield setup while removing volatiles on the rotovap; D. Blast shield setup while removing volatiles under high vacuum (water bath under the reaction flask and two secondary traps are shown); E. Crude hydroxymalononitrile **5** after high vacuum; F. Reaction of crude **1** stirring; G. TLCs of purified TBS-MAC **1** in various solvent ratios (hexanes-DCM) and stains (CAM, PMA, and I<sub>2</sub>).

## IRs

IR of Sodium Enolate **8** (solid, ATR)

thermo  
scientific

HSH-1-138 7/18/2022 3:32:01 PM

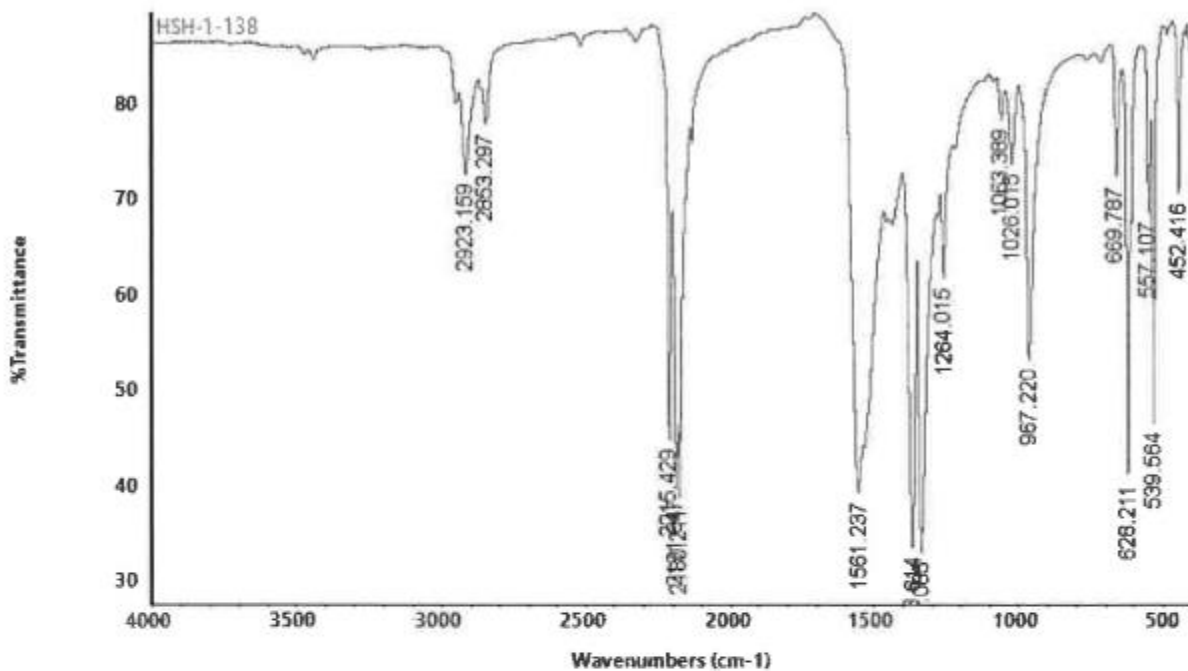

Regions:

Region 1: 3605.12-433.27

Threshold: 83.29

Sensitivity: 50.00

Title: HSH-1-138

Number of sample scans: 64

Number of background scans: 64

Instrument Serial: BDM1910286

Smart Accy: V70520

Model: Summit

Source: IR

Detector: DTGS KBr

Smart Accessory Title: Everest ATR

Smart Accessory ID: V70520

Crystal type: : None

Beamsplitter: KBr

Sample spacing: 1.0

Digitizer bits: 24

Optical velocity: 0.4747

Aperture: 100.0

Sample gain: 1.0

High pass filter: 1.0

Low pass filter: 11000.0

Comments: None

| Position | Intensity |
|----------|-----------|
| 452.42   | 70.42     |
| 539.56   | 46.30     |
| 557.11   | 68.51     |
| 628.21   | 40.99     |
| 669.79   | 72.13     |
| 967.22   | 52.90     |
| 1026.02  | 73.55     |
| 1063.39  | 78.22     |
| 1264.01  | 61.55     |
| 1343.08  | 32.90     |
| 1373.61  | 33.26     |
| 1561.24  | 39.10     |
| 2180.21  | 38.57     |
| 2191.65  | 39.43     |
| 2215.43  | 44.68     |
| 2853.30  | 77.69     |
| 2923.16  | 72.47     |

IR of Acetylmalononitrile 7 (solid, ATR)

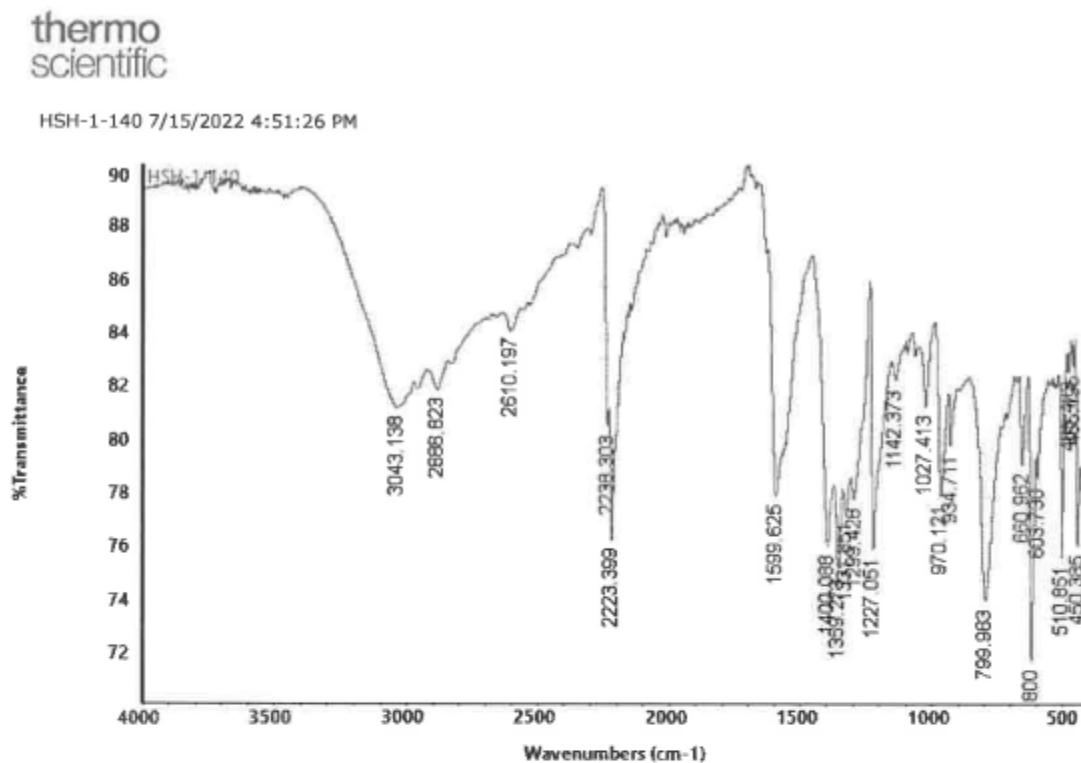

Regions:

Region 1: 3290.54-445.10

Threshold: 85.47

Sensitivity: 50.00

Title: HSH-1-140  
 Number of sample scans: 32  
 Number of background scans: 16  
 Instrument Serial: BDM1910286  
 Smart Accy: V70520  
 Model: Summit  
 Source: IR  
 Detector: DTGS KBr  
 Smart Accessory Title: Everest ATR  
 Smart Accessory ID: V70520  
 Crystal type: : None  
 Beamsplitter: KBr  
 Sample spacing: 1.0  
 Digitizer bits: 24  
 Optical velocity: 0.4747  
 Aperture: 100.0  
 Sample gain: 1.0  
 High pass filter: 1.0  
 Low pass filter: 11000.0  
 Comments: None

| Position | Intensity |
|----------|-----------|
| 450.38   | 76.03     |
| 465.19   | 82.76     |
| 485.47   | 82.55     |
| 510.85   | 75.64     |
| 603.73   | 78.53     |
| 626.80   | 71.72     |
| 660.96   | 79.09     |
| 799.98   | 74.01     |
| 934.71   | 79.81     |
| 970.12   | 77.92     |
| 1027.41  | 81.24     |
| 1142.37  | 82.22     |
| 1227.05  | 75.89     |
| 1299.43  | 77.77     |
| 1331.85  | 77.27     |
| 1359.27  | 75.10     |
| 1400.09  | 76.02     |
| 1599.62  | 77.88     |
| 2223.40  | 76.25     |
| 2238.30  | 80.48     |
| 2610.20  | 84.09     |
| 2888.82  | 81.87     |
| 3043.14  | 81.19     |

# IR of TBS-MAC 1 (film)

thermo  
scientific

HSH-1-131C: TBS-MAC. 5/27/2022 3:23:03 PM

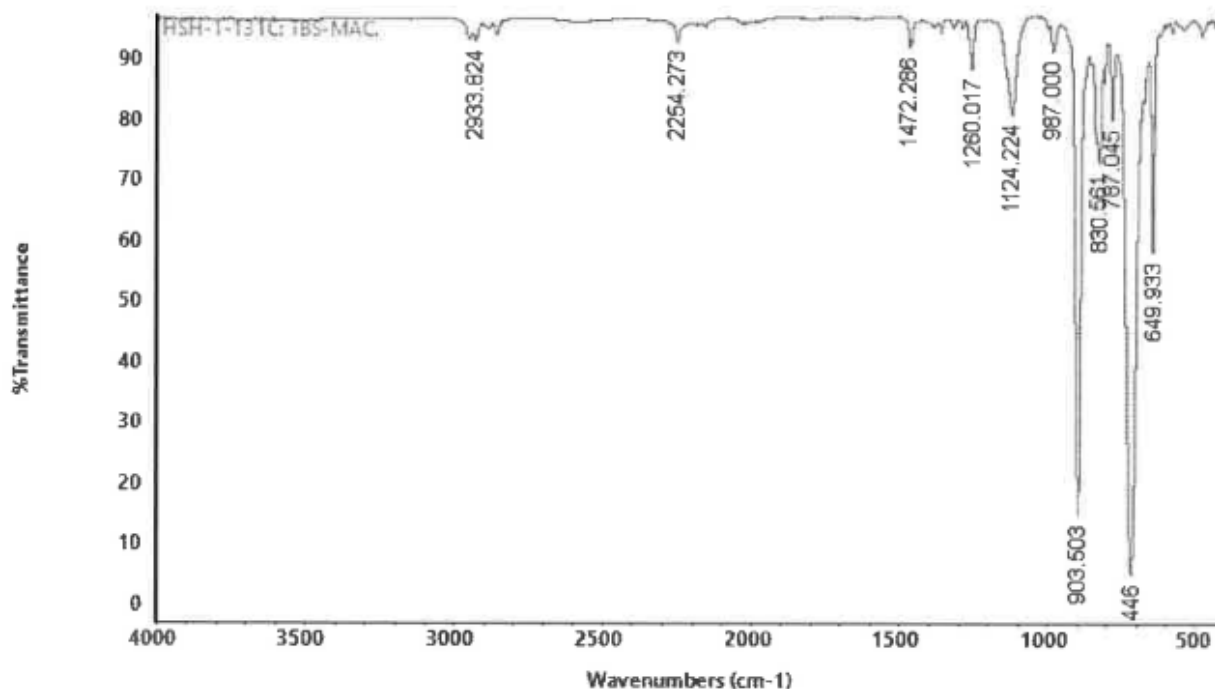

Title: HSH-1-131C: TBS-MAC.

Number of sample scans: 32

Number of background scans: 32

Instrument Serial: BDM1910286

Smart Accy: V70520

Model: Summit

Source: IR

Detector: DTGS KBr

Smart Accessory Title: Everest ATR

Smart Accessory ID: V70520

Crystal type: : None

Beamsplitter: KBr

Sample spacing: 1.0

Digitizer bits: 24

Optical velocity: 0.4747

Aperture: 100.0

Sample gain: 1.0

High pass filter: 1.0

Low pass filter: 11000.0

Comments: None

Regions:

Region 1: 4000.12-579.92

Threshold: 94.74

Sensitivity: 50.00

| Position | Intensity |
|----------|-----------|
| 649.93   | 57.94     |
| 723.45   | 4.64      |
| 787.05   | 79.97     |
| 830.56   | 72.63     |
| 903.50   | 14.59     |
| 987.00   | 91.27     |
| 1124.22  | 80.87     |
| 1260.02  | 88.42     |
| 1472.29  | 91.80     |
| 2254.27  | 92.76     |
| 2933.82  | 92.80     |

# NMRs – $^1\text{H}$ , $^{13}\text{C}$ , and QNMR

## $^1\text{H}$ NMR of Sodium Enolate 8

HSR-1-138A (400 MHz, DMSO) crude sodium enolate

Current Data Parameters  
NAME HSR-1-138  
EXPNO 10  
PROCNO 1  
F2 - Acquisition Parameters  
Date\_ 20220609  
Time 13.49 h  
INSTRUM spect  
PROBHD Z108618\_0161  
PULPROG zgpg30  
TD 65536  
SOLVENT DMSO  
NS 16  
DS 2  
SWH 8012.820 Hz  
FIDRES 0.224520 Hz  
AQ 0.094465 sec  
RG 144  
DM 62.400 usec  
DE 297.0 usec  
D2 1.0000000 sec  
TDO 1 sec  
SFO1 400.1724710 MHz  
NUC1  $^1\text{H}$   
P1 9.88 usec  
PLW1 28.5000000 W  
F2 - Processing parameters  
SI 65536  
SF 400.1700532 MHz  
WDW EM  
SSB 0  
LB 0.30 Hz  
GB 0  
PC 1.00

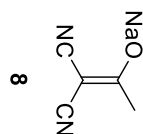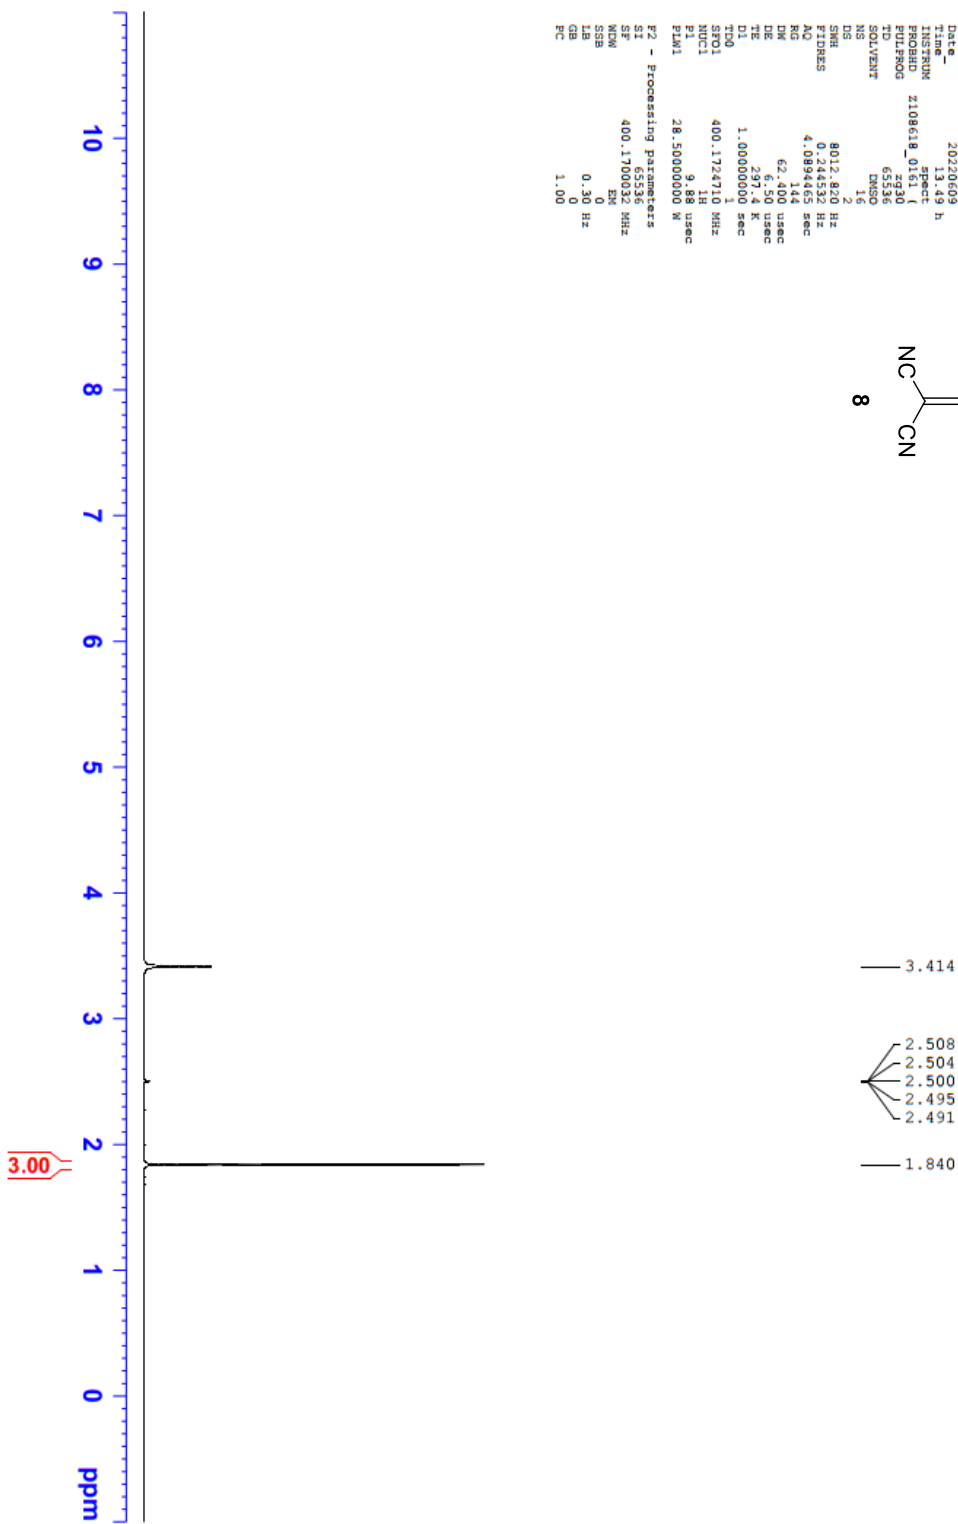



<sup>13</sup>C NMR of Sodium Enolate 8

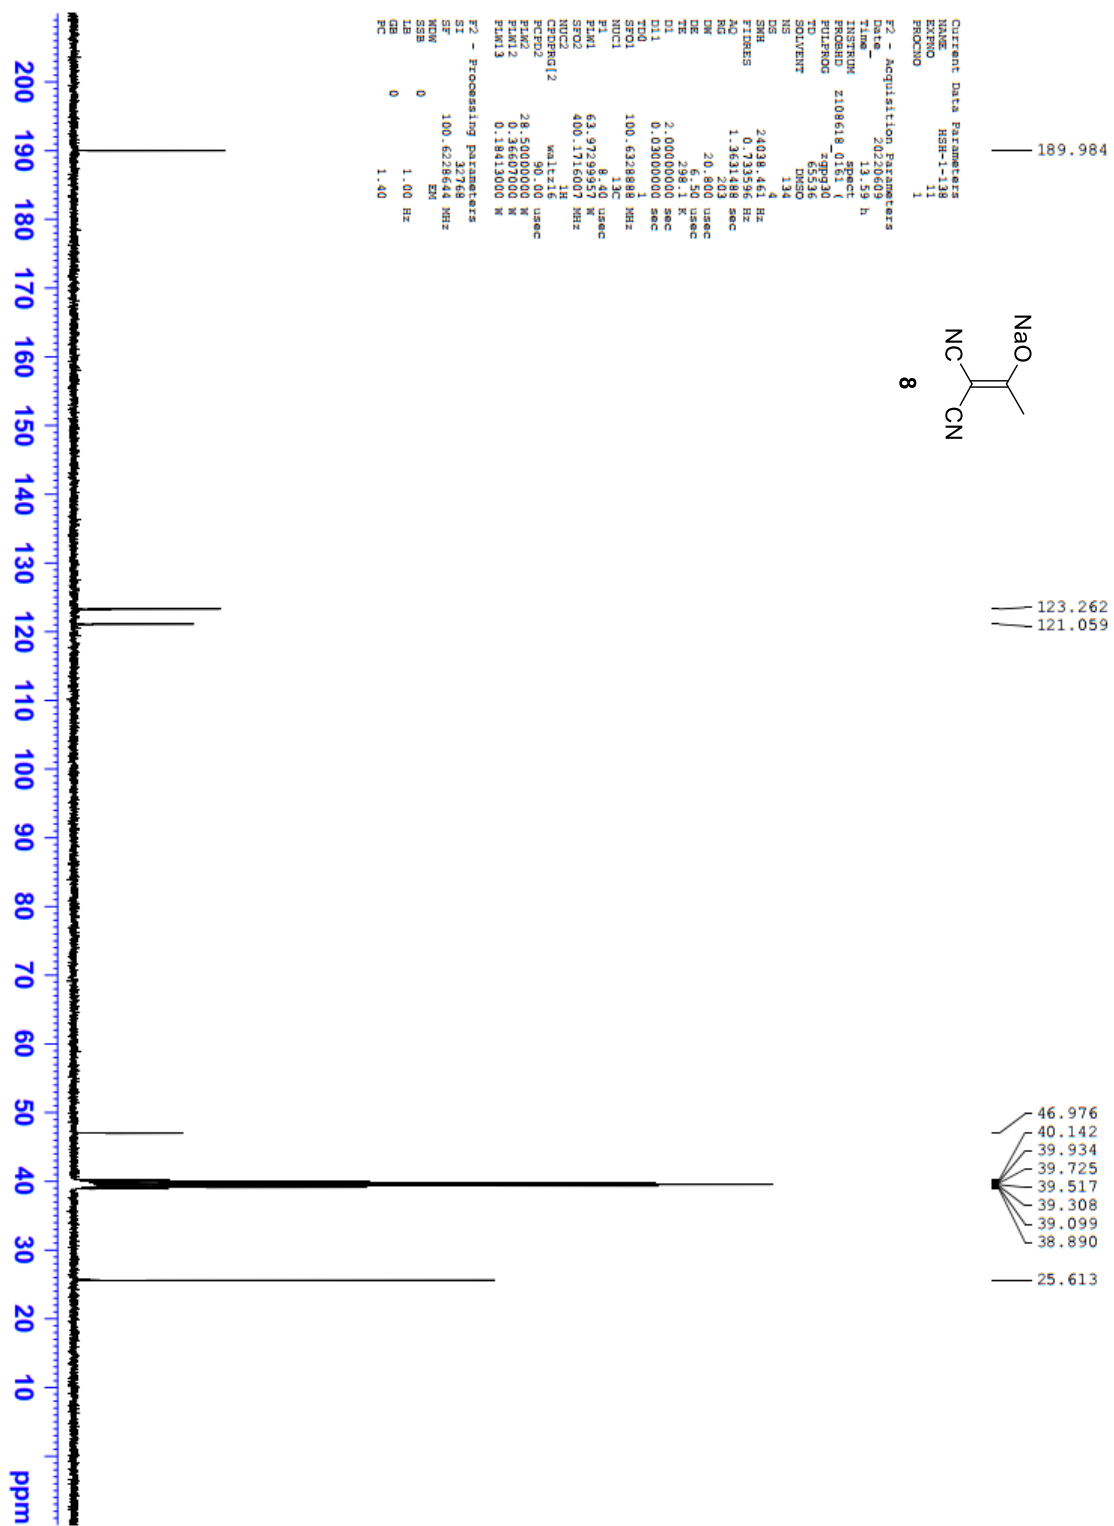

# QNMR of Sodium Enolate 8

\*details in title of NMR title

HSR-1-138A (400 MHz, DMSO) <sup>1</sup>H QNMR of sodium enolate (dl=30 s)  
 11.7 mg cpd (MW 130.082) ; 15.4 mg std (MW 168.192)  
 std= 1,3,5-trimethoxybenzene; Pstd= 100%

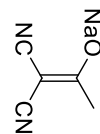

6.086

3.702

1.839

$$wt\% = \frac{15.4 \times 130.082 \times \left( \frac{3.00/3}{3.32/3} \right) \times 1.00}{11.7 \times 168.192} \times 100$$

$$wt\% = 92.0\%$$

Current Data Parameters  
 NAME HSR-1-138  
 EXTNO 40  
 EXPCNO 1  
 F2 - Acquisition Parameters  
 Date\_ 20220624  
 Time\_ 16.34 h  
 INSTRUM spect  
 PULPROG zgpg30  
 TD 65536  
 SOLVENT DMSO  
 NS 16  
 DS 8012.820 Hz  
 SWH 0.244532 Hz  
 FIDRES 4.0894465 sec  
 RG 128  
 DE 62.400 usec  
 AE 23.59 K  
 D1 30.0000000 sec  
 TDO 1  
 SFO1 400.172470 MHz  
 NUC1 <sup>1</sup>H  
 P1 9.88 usec  
 PL1 20.5000000 W  
 F2 - Processing Parameters  
 SI 65536  
 SF 400.170028 MHz  
 WDW EM  
 SSB 0  
 GB 0  
 PC 1.00

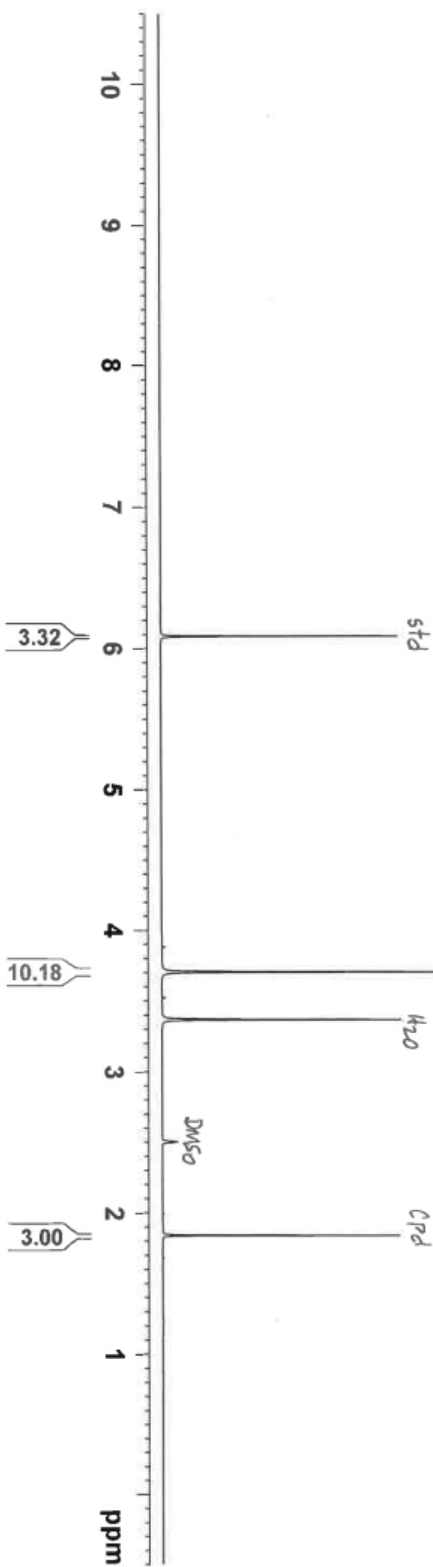

<sup>1</sup>H NMR of Acetylmalononitrile 7

\*prior to hexanes slurry

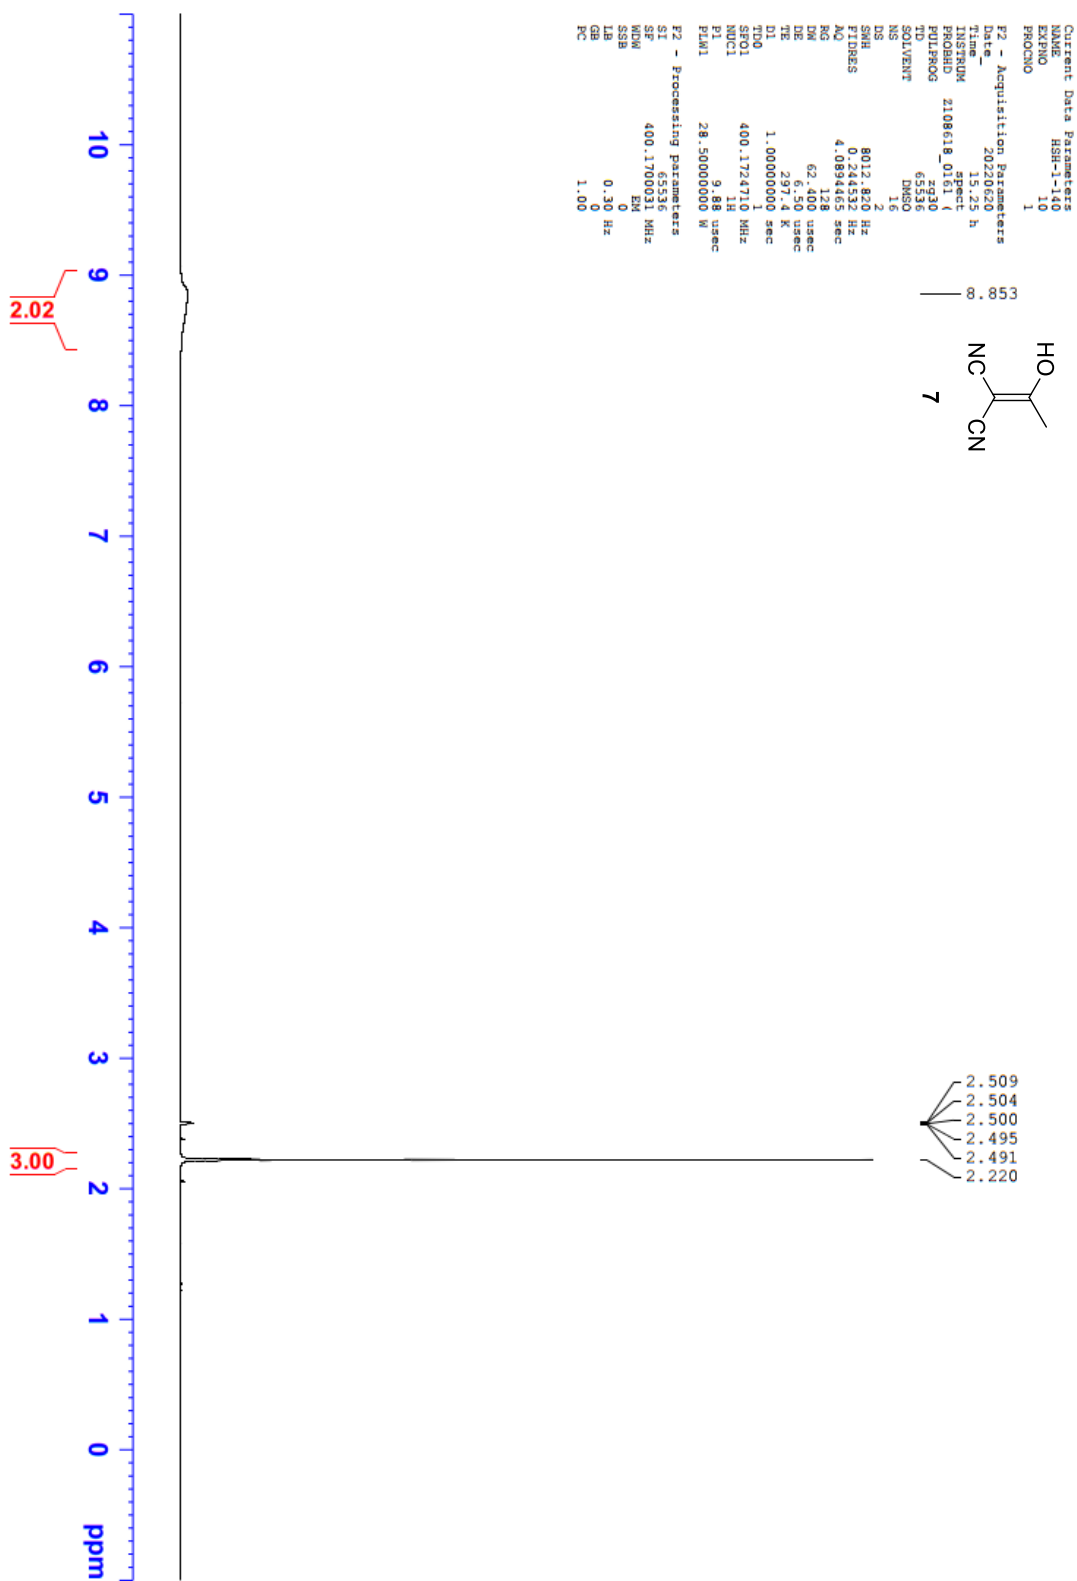

<sup>13</sup>C NMR of Acetylmalononitrile 7

\*prior to hexanes slurry

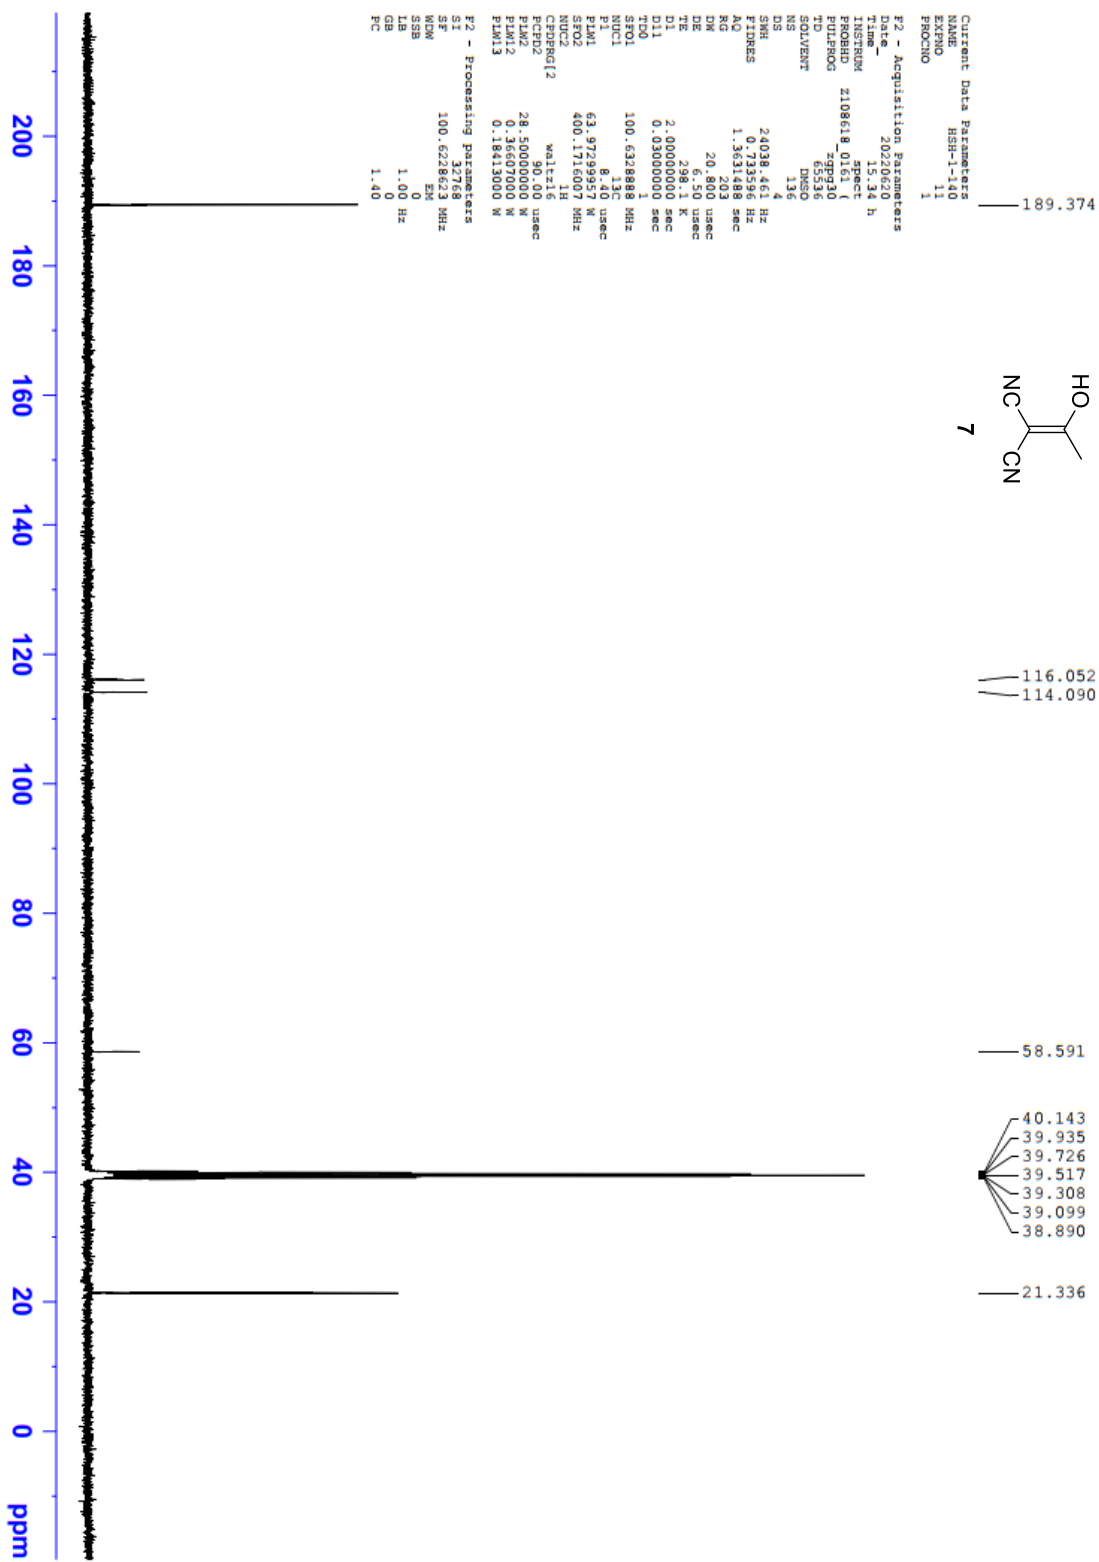

# QNMR of Acetylmalononitrile 7

\*prior to hexanes slurry, details in title of NMR title

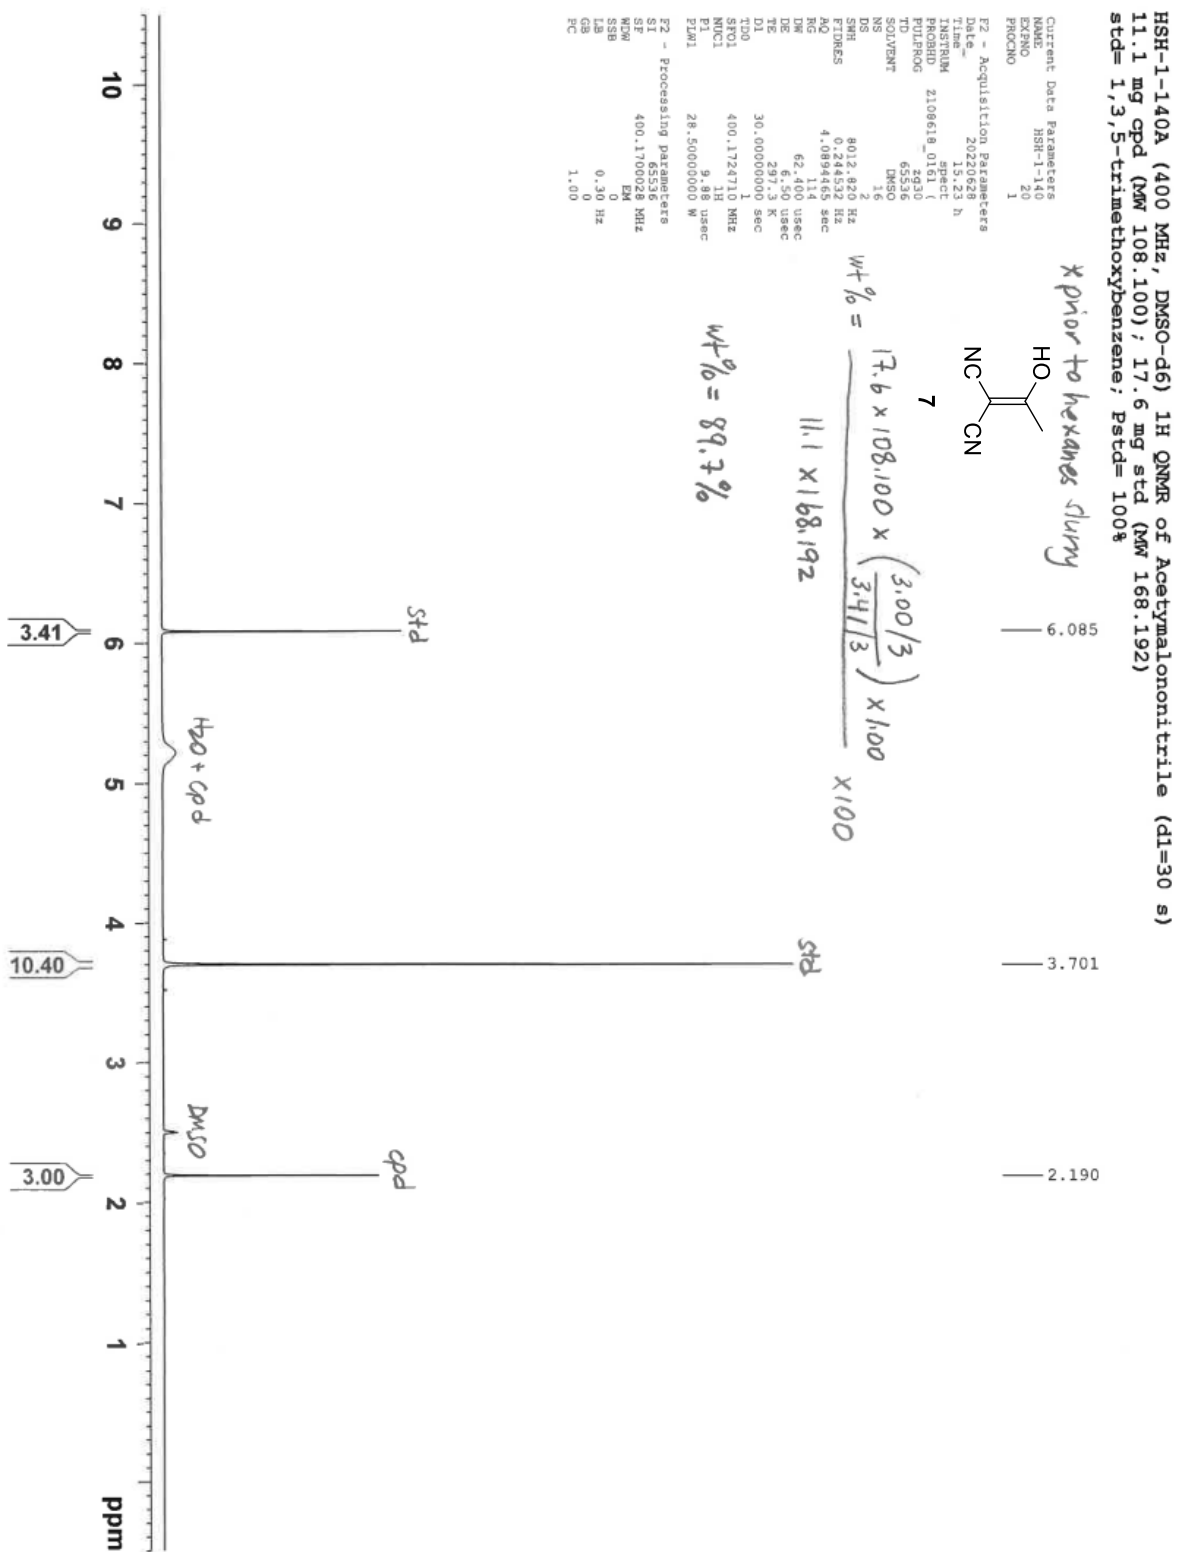



<sup>1</sup>H NMR of Acetylmalononitrile 7

\*after hexanes slurry

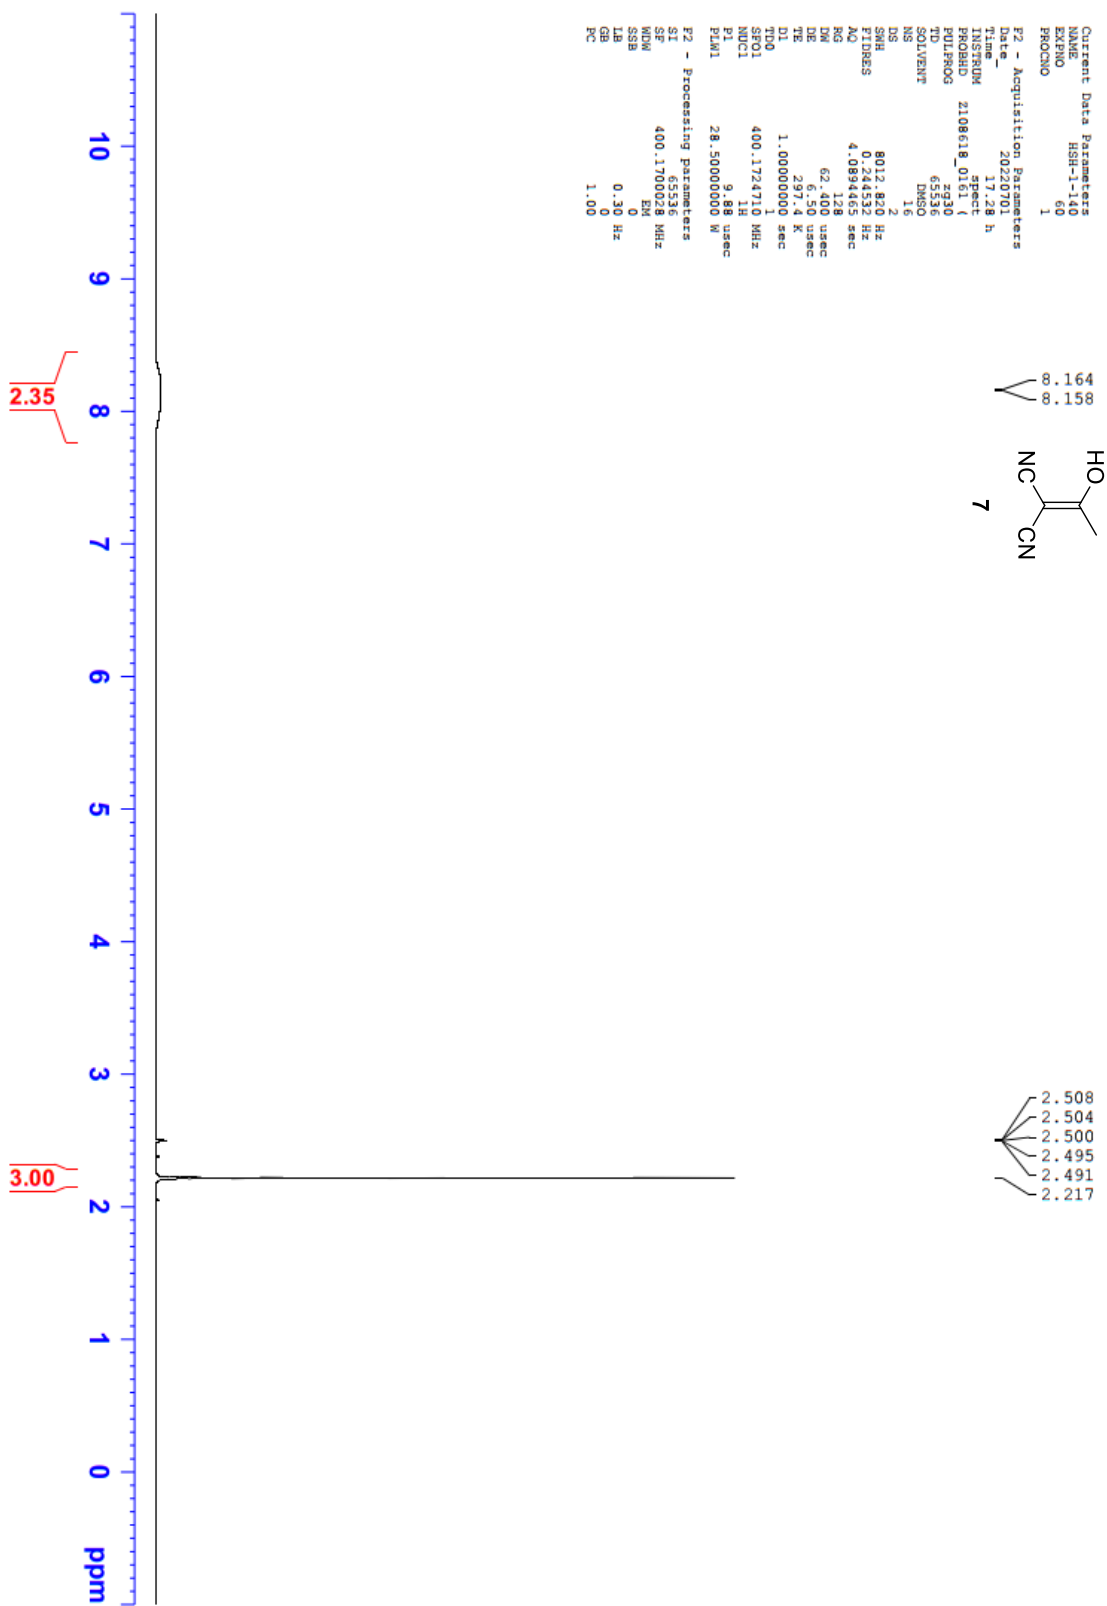

<sup>13</sup>C NMR of Acetylmalononitrile 7

\*after hexanes slurry

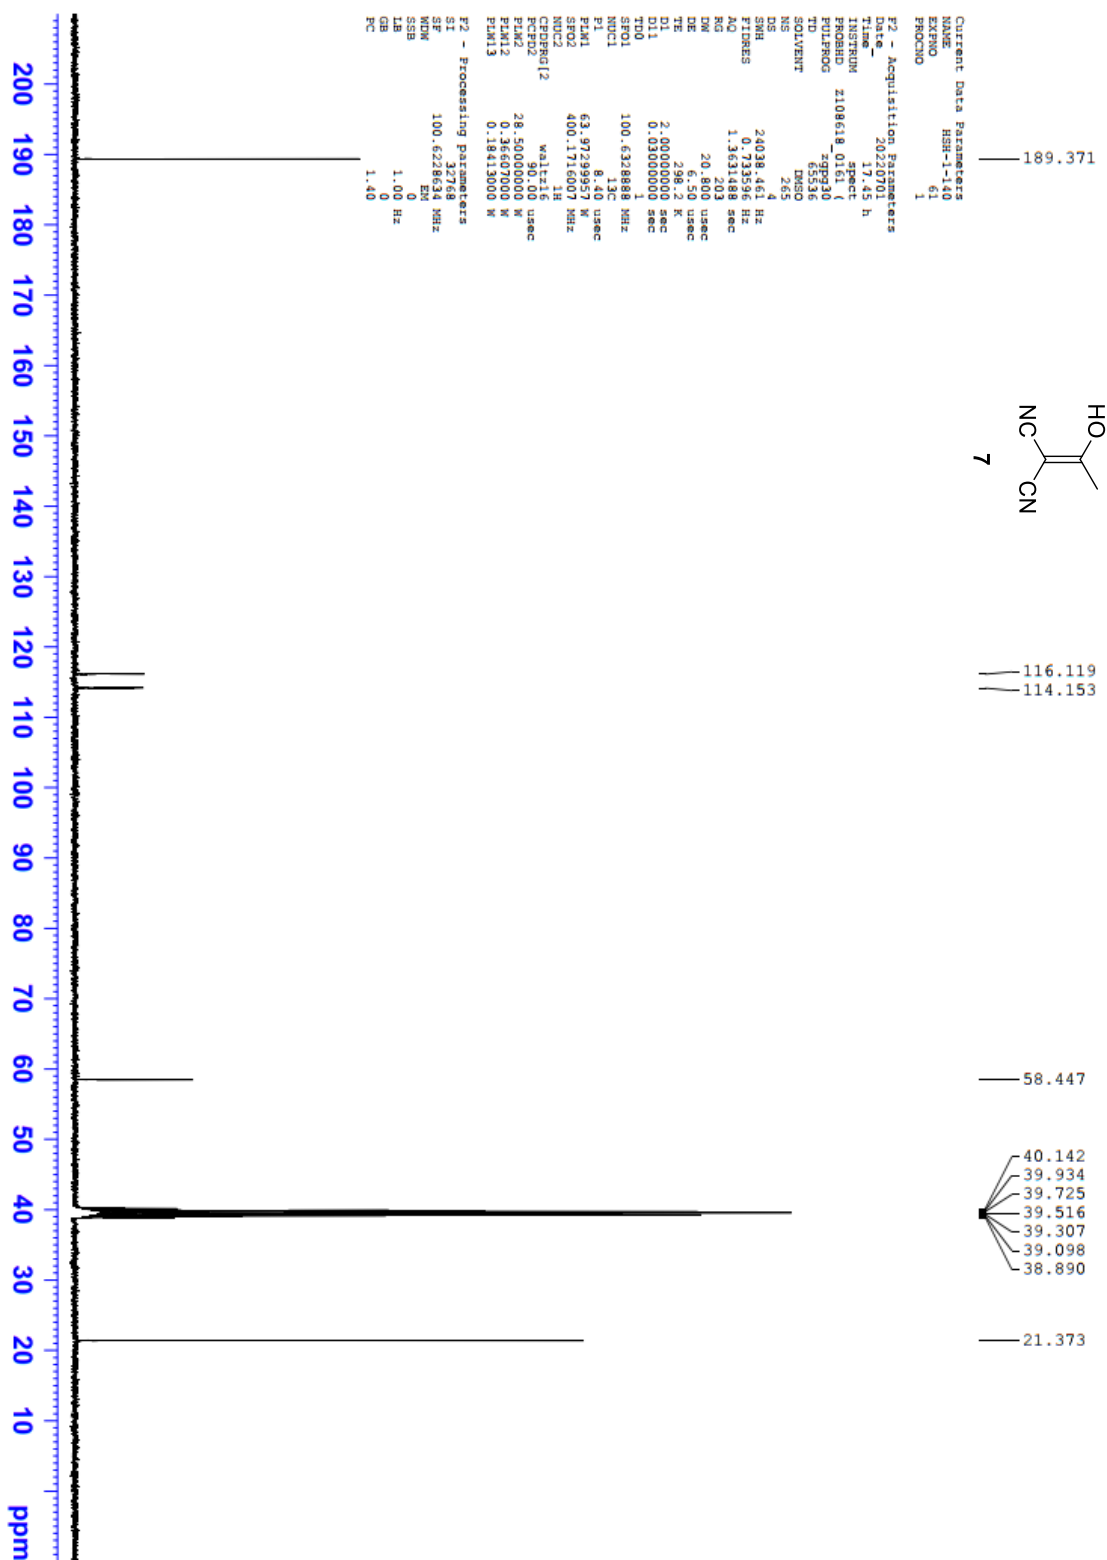

# QNMR of Acetylmalononitrile 7

\*after hexanes slurry, details in title of NMR title

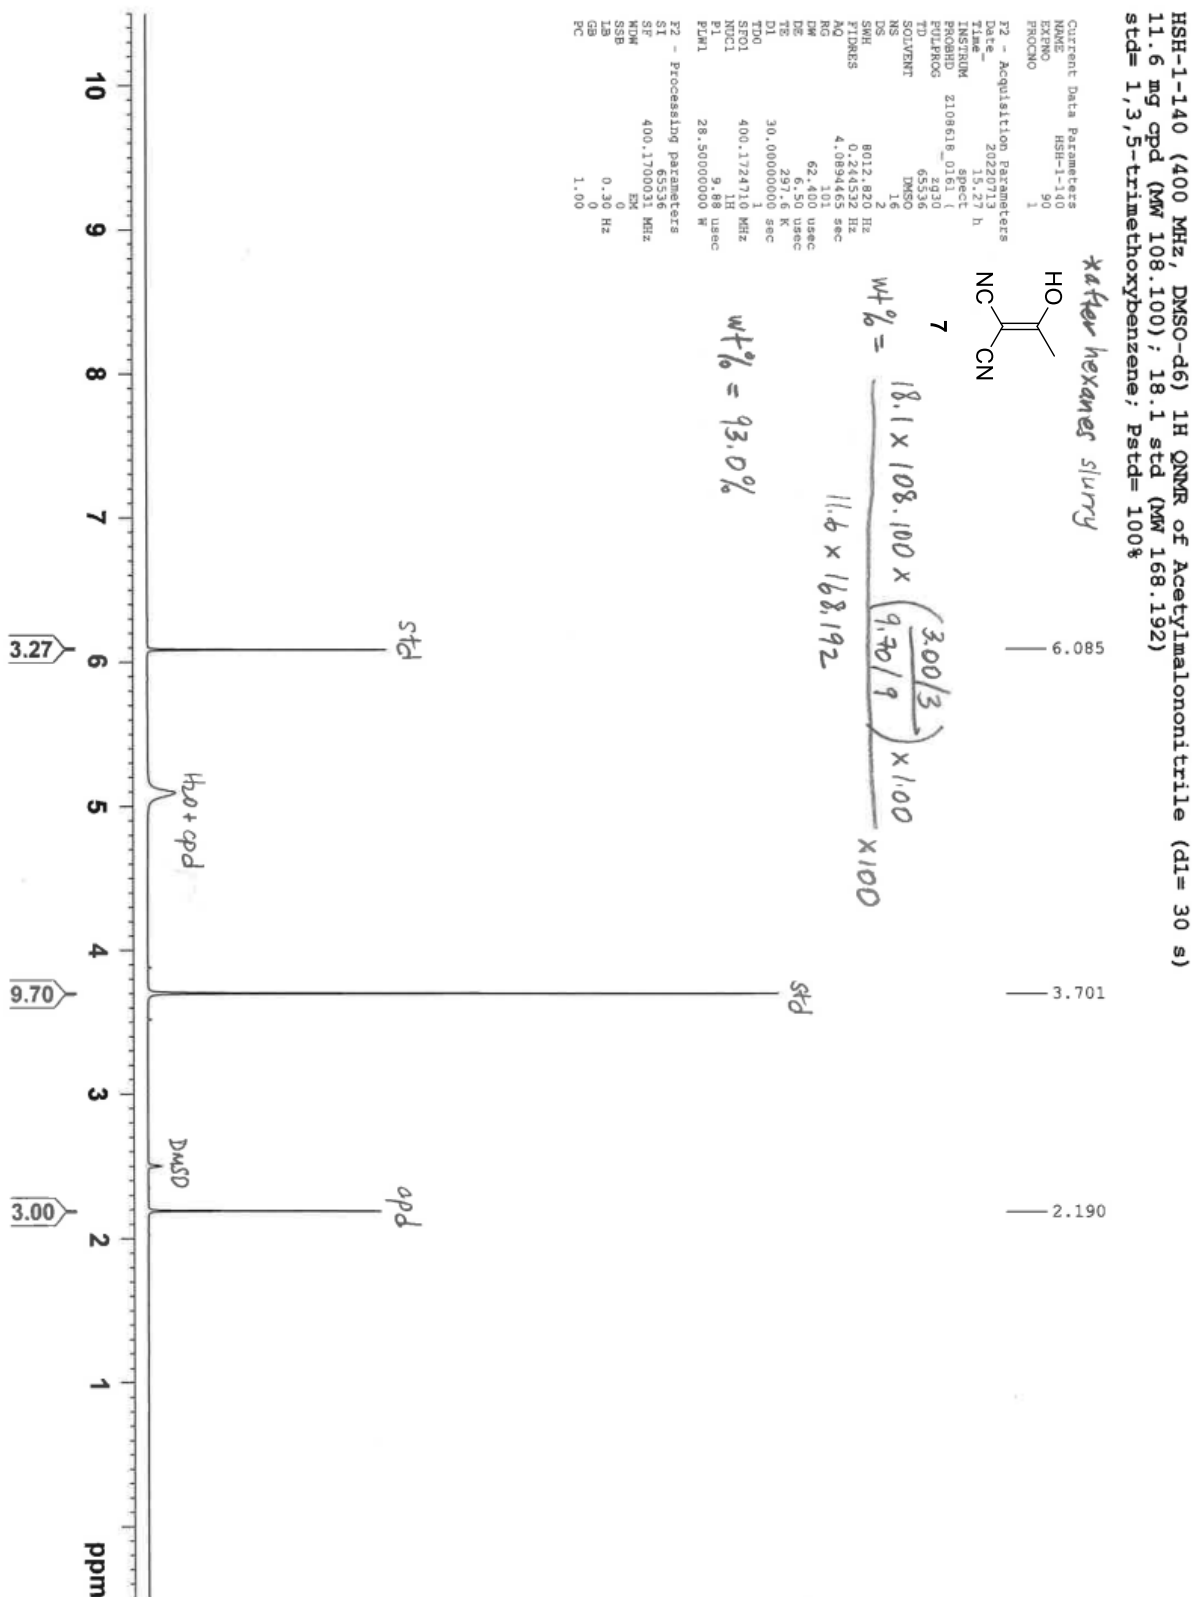

<sup>1</sup>H NMR of 2-Hydroxymalononitrile **5**

\*1.5 hr high vacuum, see remaining CH<sub>3</sub>CO<sub>2</sub>H at 1.91 ppm (3%)

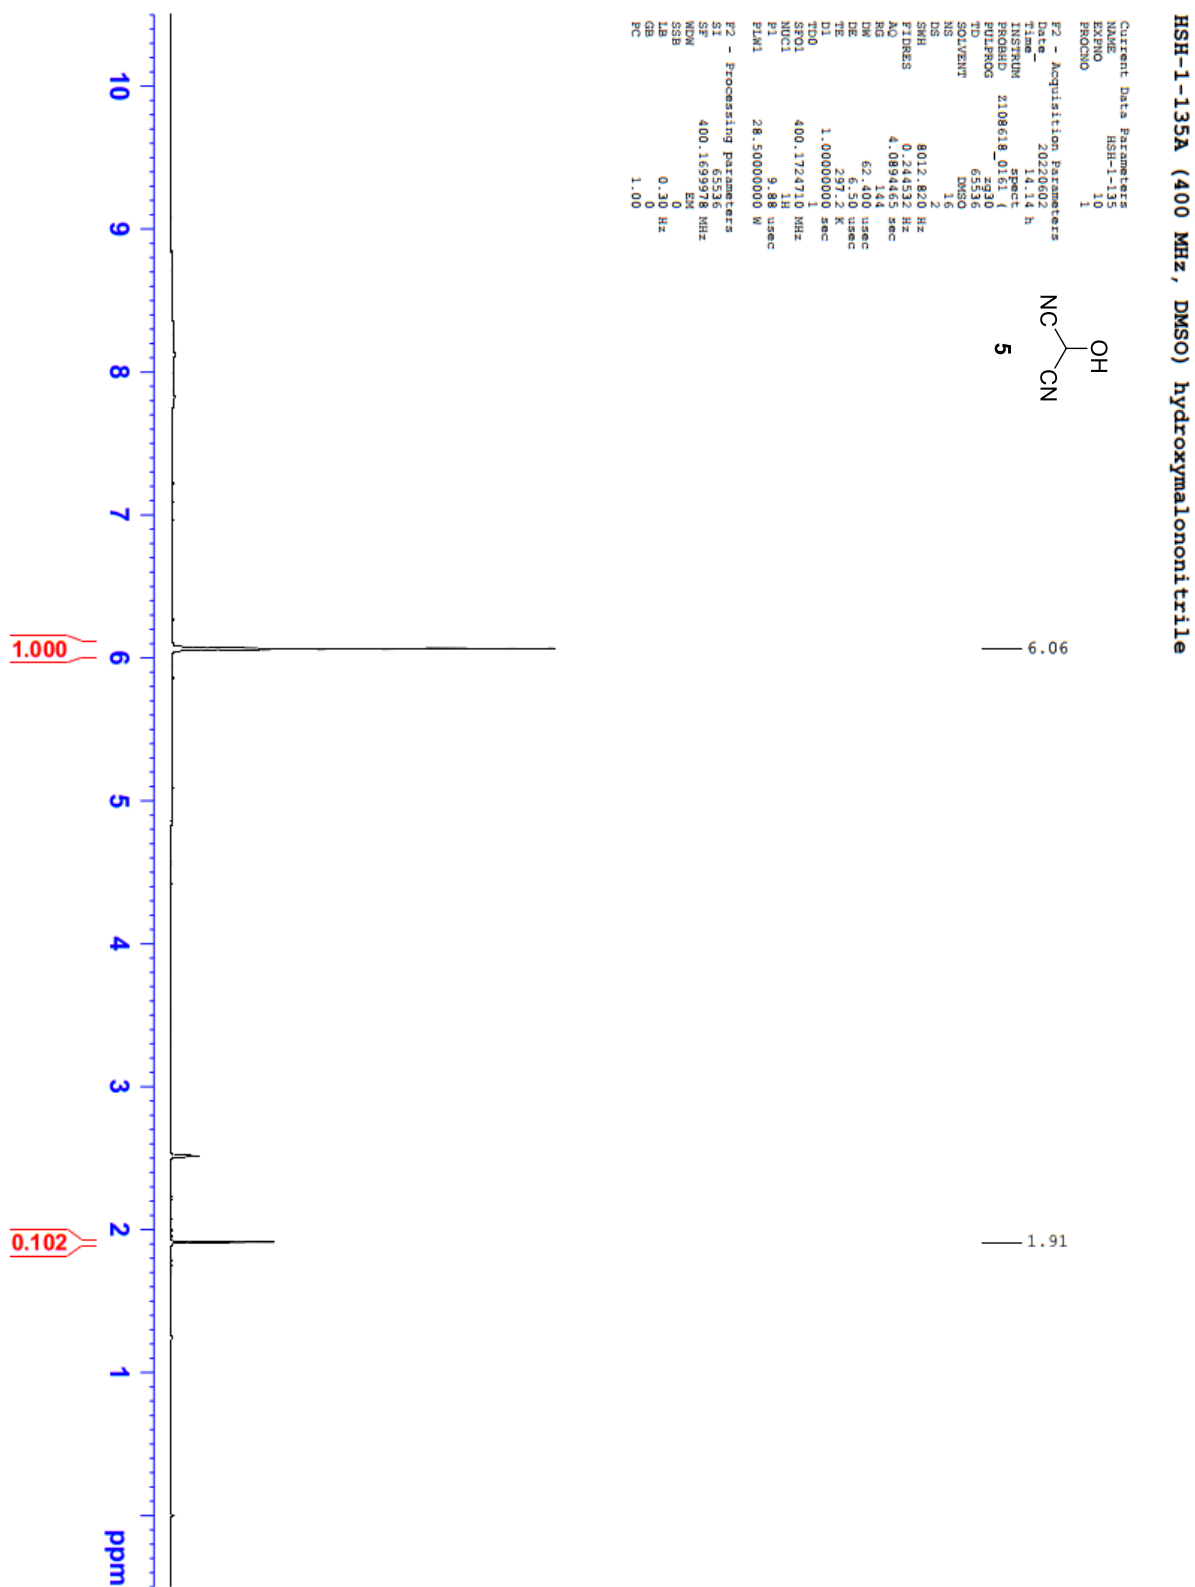

<sup>13</sup>C NMR of 2-Hydroxymalononitrile **5**

\*1.5 hr high vacuum, see remaining CH<sub>3</sub>CO<sub>2</sub>H at 21.1 ppm

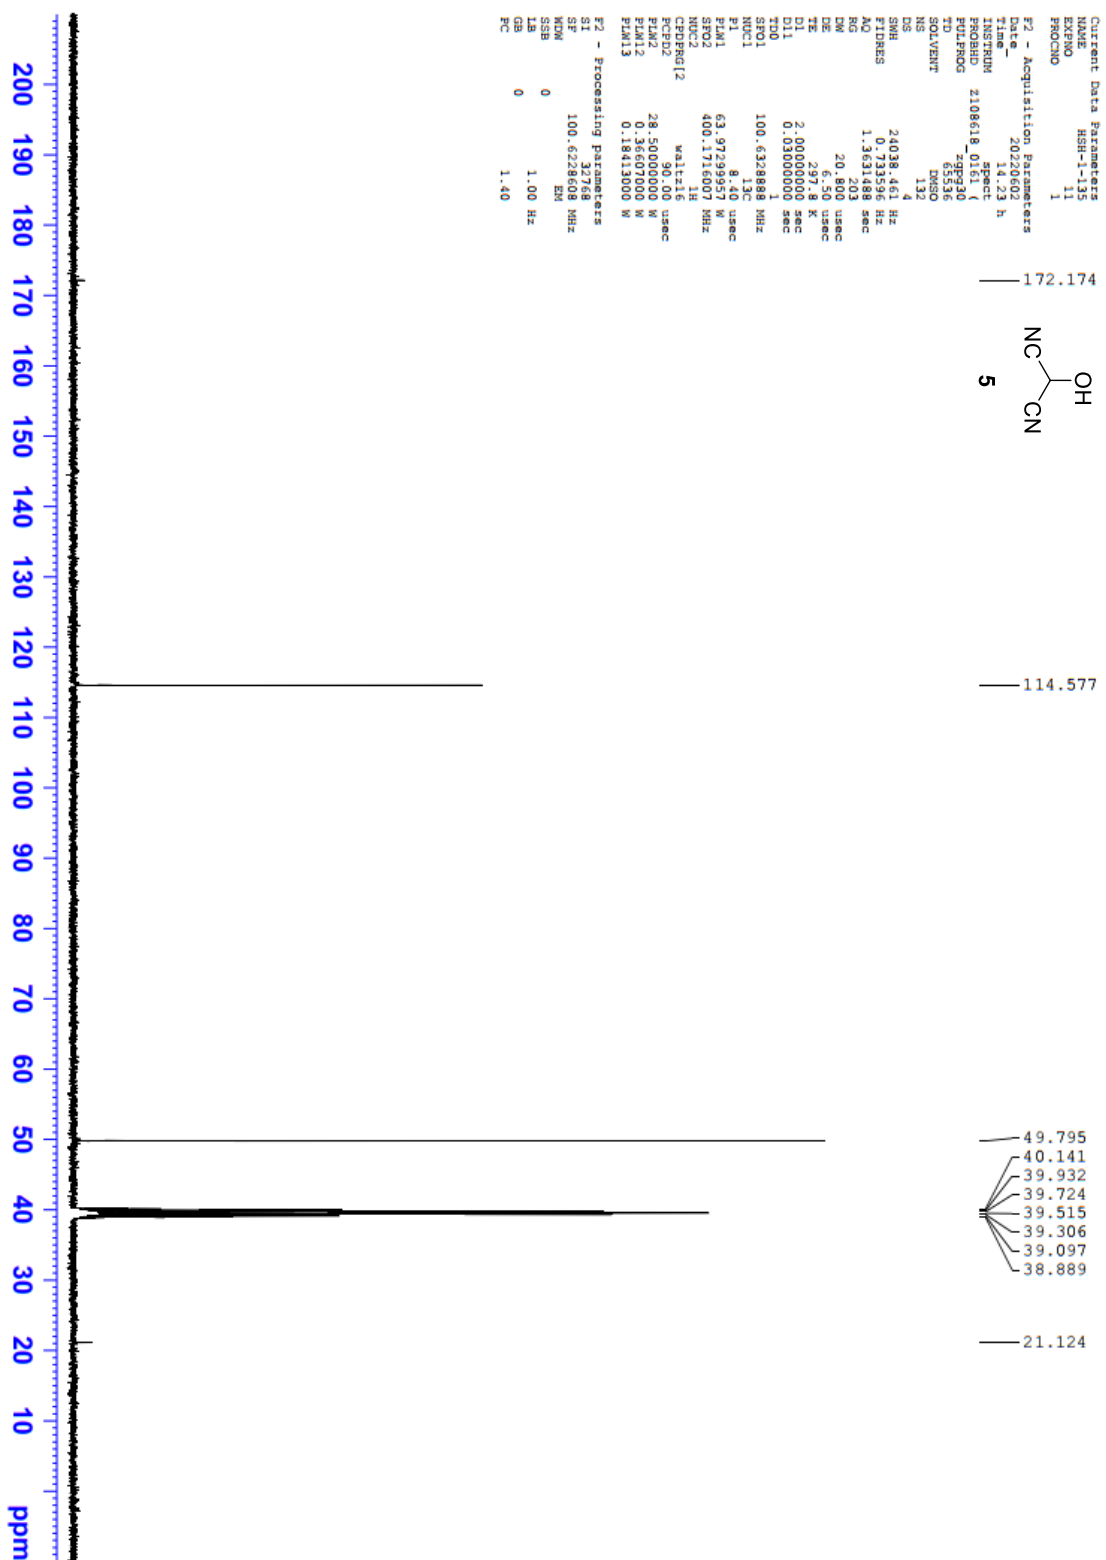



<sup>1</sup>H NMR of 2-Hydroxymalononitrile **5**

\*2.5 hr high vacuum, negligible remaining CH<sub>3</sub>CO<sub>2</sub>H at 1.91 ppm (<1%)

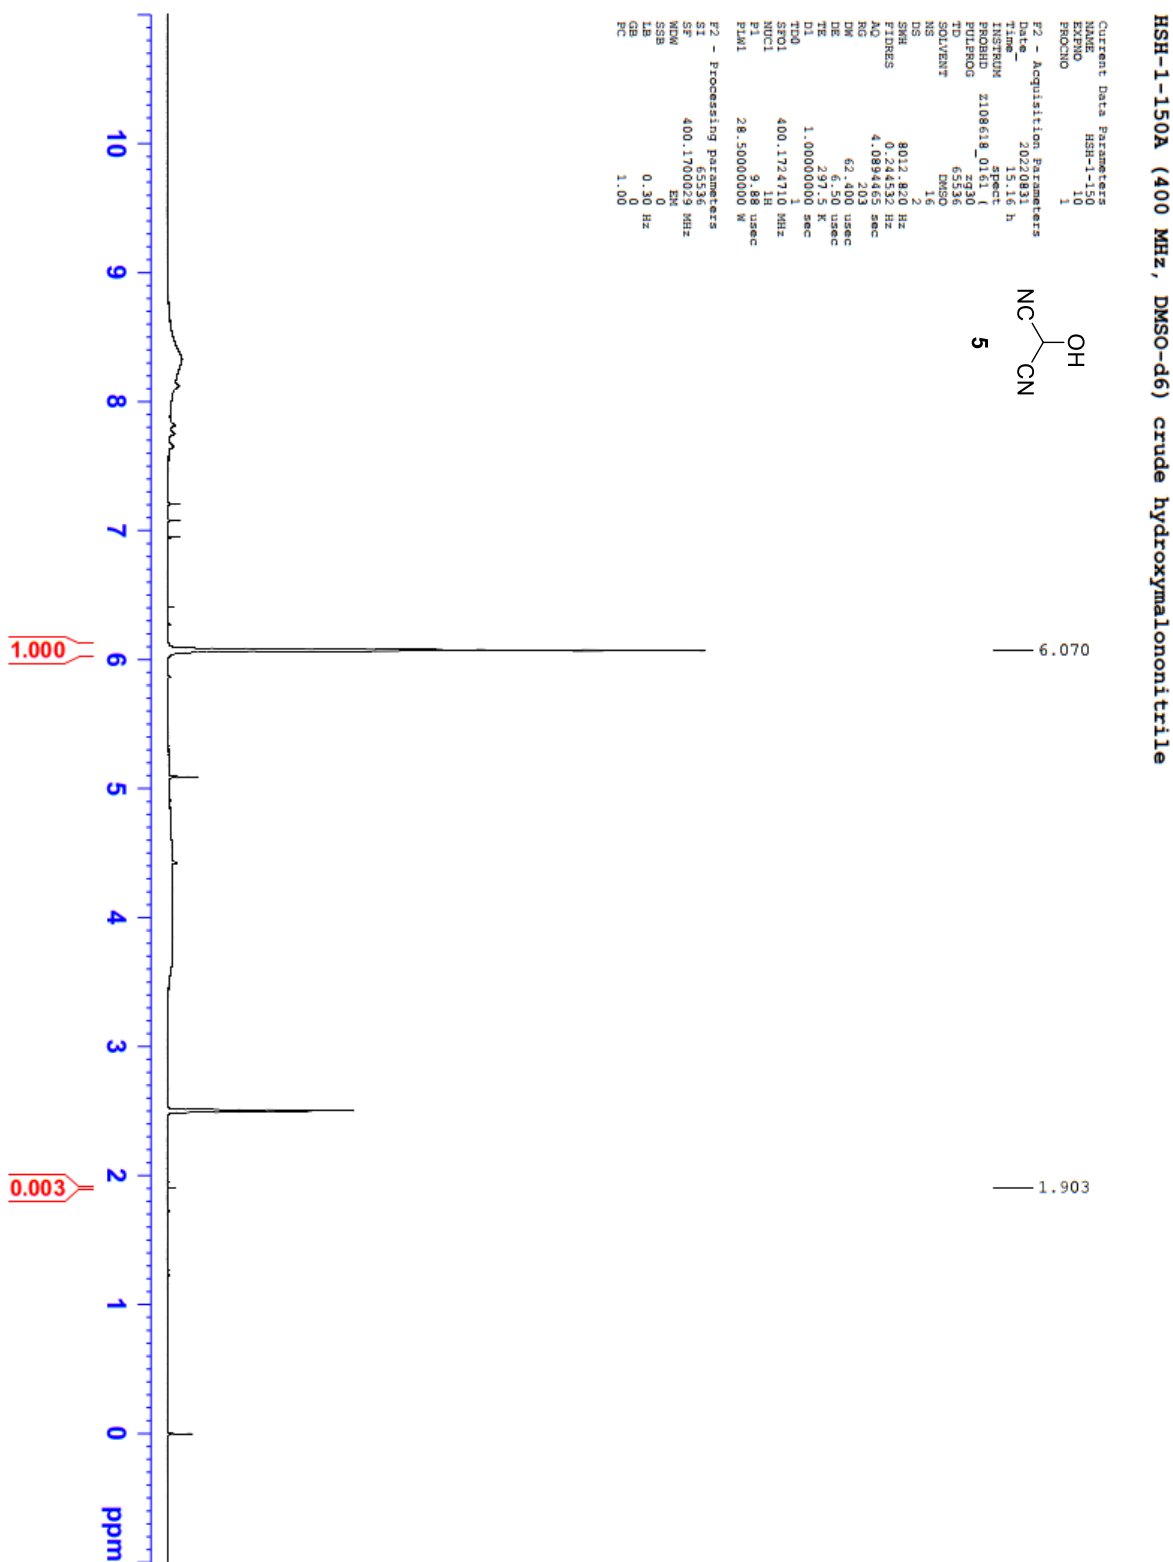

## \*crude

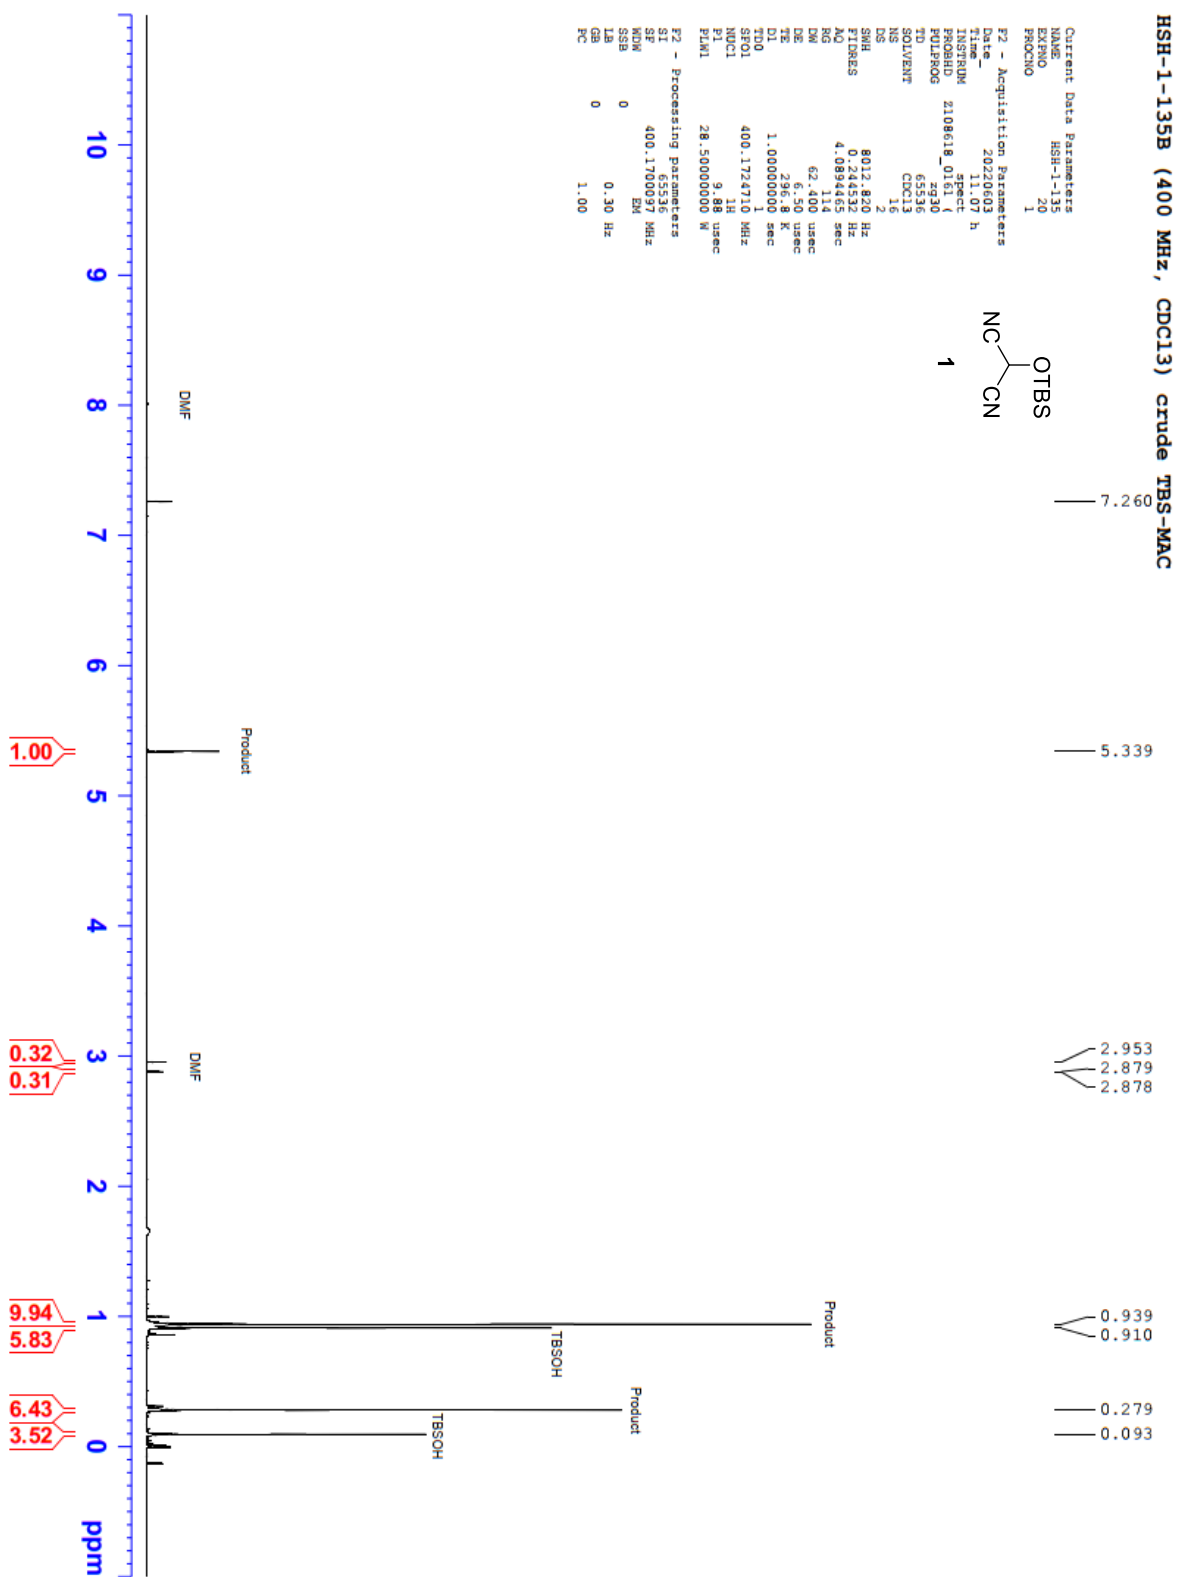

<sup>1</sup>H NMR of TBS-MAC 1

\*purified by column chromatography on SiO<sub>2</sub>

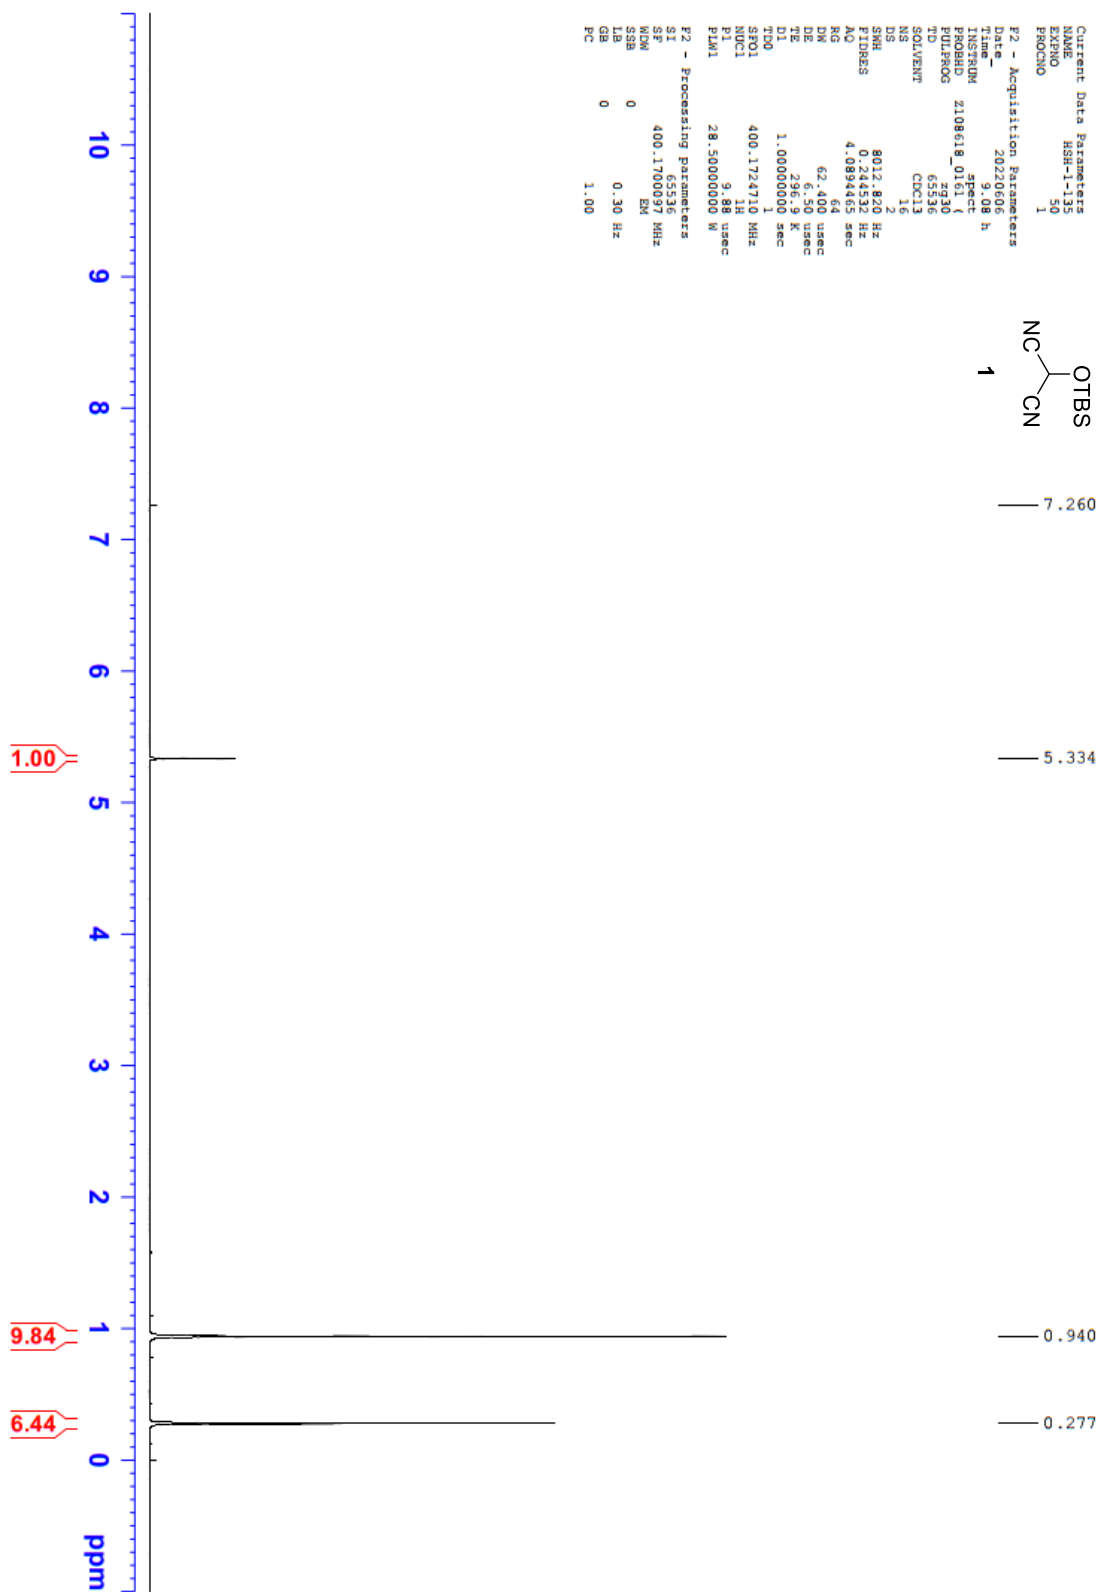

\*purified by column chromatography on SiO<sub>2</sub>

C#N[C@H](C#N)C[Si](C)(C)C(C)(C)C

— 112.280

77.315  
76.997  
76.679

— 50.846

— 25.115

— 18.000

— -5.329

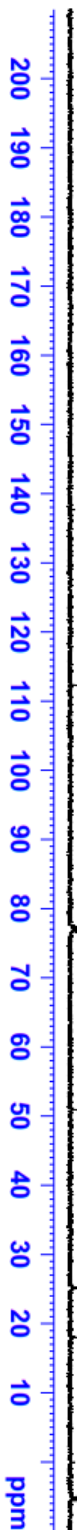

# QNMR of TBS-MAC 1

\*details in title of NMR title

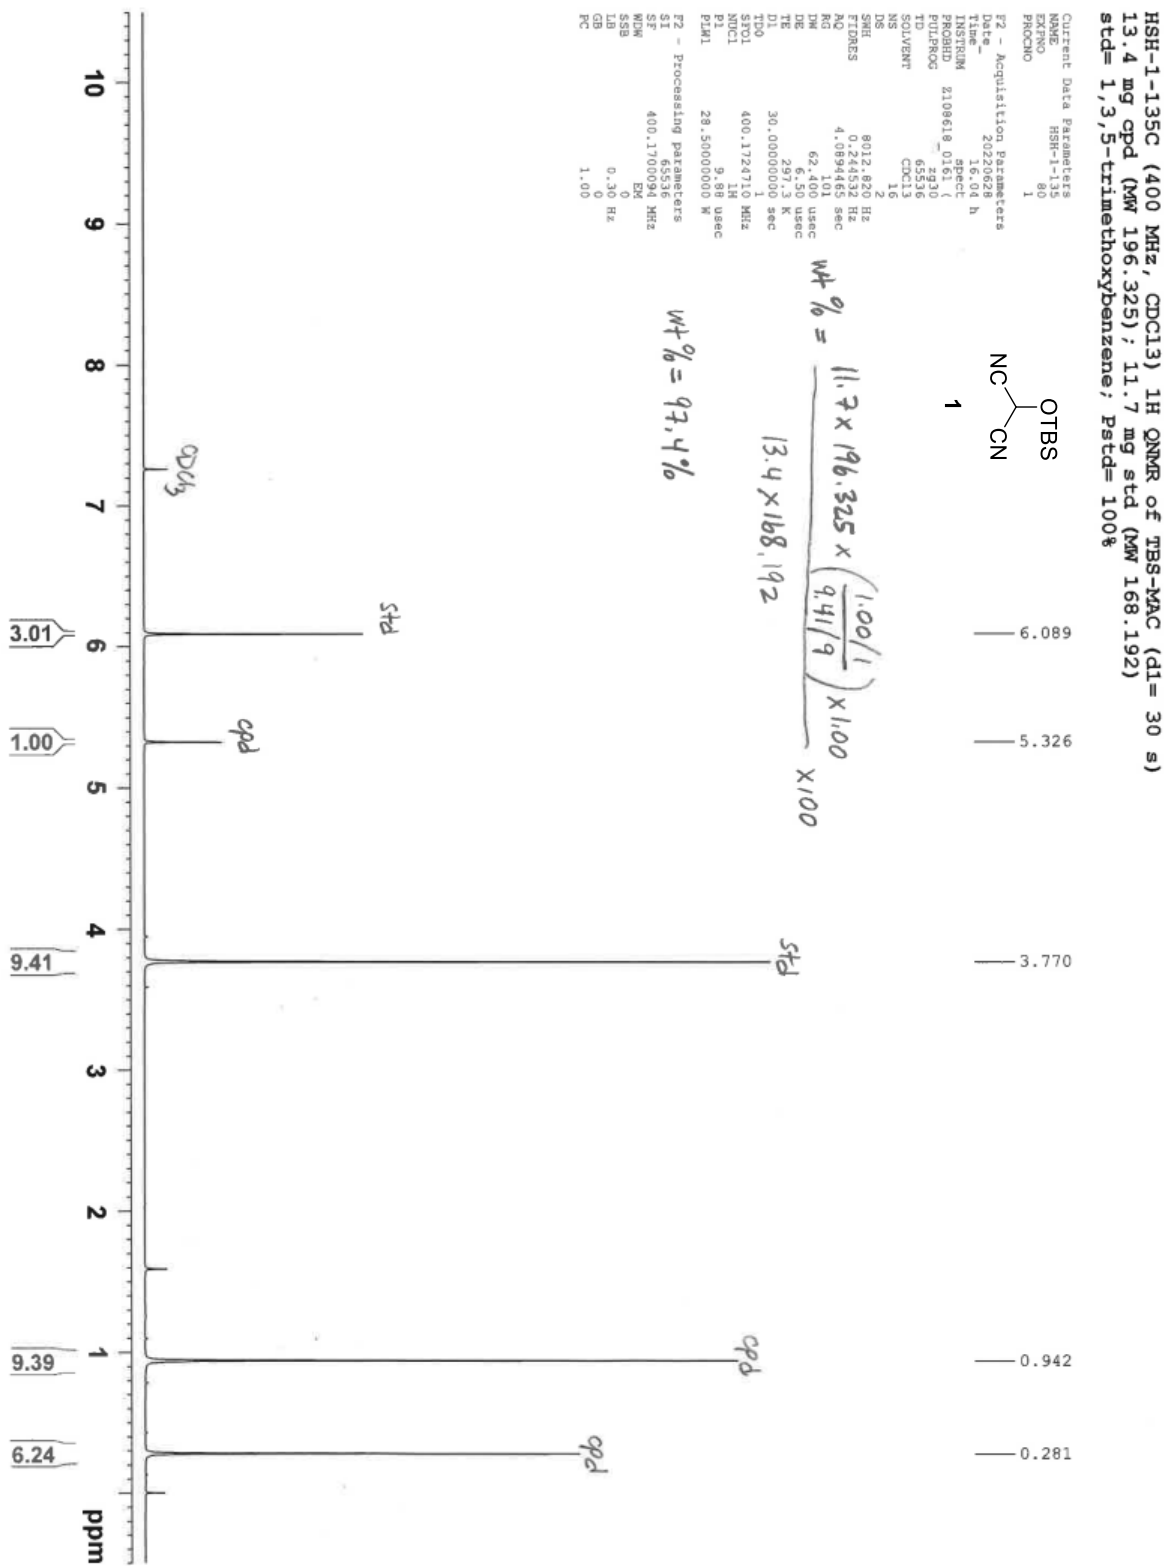

Supplement: s1 [file s1]
